1  
2  
3  
4  
5  
6  
7  
8  
9  
10  
11  
12  
13  
14  
15  
16  
17  
18  
19  
20  
21  
22  
23  
24  
25  
26  
27  
28  
29

**Title: Direct observation of adaptive tracking on ecological timescales in *Drosophila***

**Authors:** Seth M. Rudman<sup>\*1,2 †</sup>, Sharon I. Greenblum<sup>\*3,4 †</sup>, Subhash Rajpurohit<sup>\*1,5</sup>, Nicolas J. Betancourt<sup>1</sup>, Jinjoo Hanna<sup>1</sup>, Susanne Tilk<sup>3</sup>, Tuya Yokoyama<sup>3</sup>, Dmitri A. Petrov<sup>3</sup>, Paul Schmidt<sup>1 †</sup>

**Affiliations:**

1 Department of Biology, University of Pennsylvania, Philadelphia, PA 19104, USA

2 School of Biological Sciences, Washington State University, Vancouver, WA 98686, USA

3 Department of Biology, Stanford University, Stanford, CA 94305, USA

4 Department of Energy Joint Genome Institute, 2800 Mitchell Drive, Walnut Creek, CA 94598, USA

5 Department of Biological and Life Sciences, Ahmedabad University, Ahmedabad 380009, India

\* equal contribution

† co-corresponding authors: [seth.rudman@wsu.edu](mailto:seth.rudman@wsu.edu), [greensi@lbl.gov](mailto:greensi@lbl.gov), [schmidtp@upenn.edu](mailto:schmidtp@upenn.edu)

**Abstract:**

Direct observation of evolution in response to natural environmental change can resolve fundamental questions about adaptation including its pace, temporal dynamics, and underlying phenotypic and genomic architecture. We tracked evolution of fitness-associated phenotypes and allele frequencies genome-wide in ten replicate field populations of *Drosophila melanogaster* over ten generations from summer to late fall. Adaptation was evident over each sampling interval (1-4 generations) with exceptionally rapid phenotypic adaptation and large allele frequency shifts at many independent loci. The direction and basis of the adaptive response shifted repeatedly over time, consistent with the action of strong and rapidly fluctuating selection. Overall, we find clear phenotypic and genomic evidence of adaptive tracking occurring contemporaneously with environmental change, demonstrating the temporally dynamic nature of adaptation.

**One sentence summary:** Rapid environmental change drives continuous phenotypic and polygenic adaptation, demonstrating the temporal dynamism of adaptation.

30 **Main text:**

31 Continuous adaptation in response to rapidly changing environmental conditions, termed adaptive  
32 tracking, could be a crucial mechanism by which populations respond to environmental change. Adaptive  
33 tracking has historically received little study due to the impression that adaptive evolutionary change is  
34 too slow to track complex and rapidly changing selection pressures in the wild (1). Moreover, theory  
35 suggests that variable and complex selective pressures should in general lead to the evolution of  
36 phenotypic plasticity or bet-hedging (2, 3). Yet, evidence of adaptation on ecological timescales from  
37 multiple longitudinal field studies and experiments demonstrates that adaptation can indeed occur very  
38 rapidly at individual traits or loci in response to strong environmental perturbations (4–10). Whether this  
39 translates into populations undergoing adaptive tracking in response to multifarious ecological changes,  
40 when theory predicts that pleiotropy should constrain natural selection and prevent adaptive tracking (11,  
41 12), is unknown. If adaptive tracking does indeed occur in such situations, it would have broad  
42 implications for our understanding of the limits and pace of polygenic adaptation (13), the prevalence of  
43 fluctuating selection (14) and its role in the maintenance of genetic variation (15), and the importance of  
44 rapid adaptation in ecological outcomes (16).

45  
46 To identify adaptive tracking it is necessary to directly measure phenotypic and genotypic evolution  
47 across replicate field populations in response to ongoing natural environmental change. Ideally an  
48 experimental system would provide: 1) the means for highly accurate measurements of even subtle,  
49 heritable shifts in key independent fitness-related phenotypes and loci under selection, 2) the ability to  
50 assay multiple replicate populations exhibiting some degree of ecological and environmental realism to  
51 detect parallel genetic and phenotypic changes indicative of adaptation (17), and 3) high resolution  
52 temporal sampling to quantify rapid fluctuations in the magnitude and direction of selection as  
53 environmental changes occur.

54  
55 Here, we employ such an experimental system using field mesocosms to measure the extent, pace,  
56 repeatability, and genomic basis of adaptive tracking using *Drosophila melanogaster* in the naturally  
57 fluctuating, temperate environment of a single growing season in Pennsylvania, USA (10, 18, 19) (Fig. 1).  
58 The design precluded migration and allowed populations to expand to a large adult census size (on the  
59 order of 100,000 adults in each replicate at the maximum population size). To initiate the experiment, an  
60 outbred baseline population of *D. melanogaster* was derived from a set of 80 inbred strains originally  
61 collected in the spring from Pennsylvania (Table S1). Ten replicate cages were each founded on July 15th,  
62 2014, with 1,000 individuals from the baseline population. All populations were tracked until the first  
63 hard frost on November 7th, 2014 and assayed at monthly intervals. Specifically, at four timepoints we  
64 measured the evolution of six complex, fitness-associated phenotypes, focusing on a set associated with  
65 either reproductive output or stress tolerance (Fig. 1). We repeatedly collected and reared individuals from  
66 each field cage in standard laboratory conditions (*i.e.*, multi-generation common garden) to distinguish  
67 evolution from phenotypic plasticity and measured all phenotypes in the F3 generation. We also tracked  
68 changes in allele frequencies genome-wide in each replicate using pooled sequencing at five timepoints,  
69 employing haplotype-based allele frequency estimation (20) in order to generate highly accurate allele  
70 frequency trajectories.

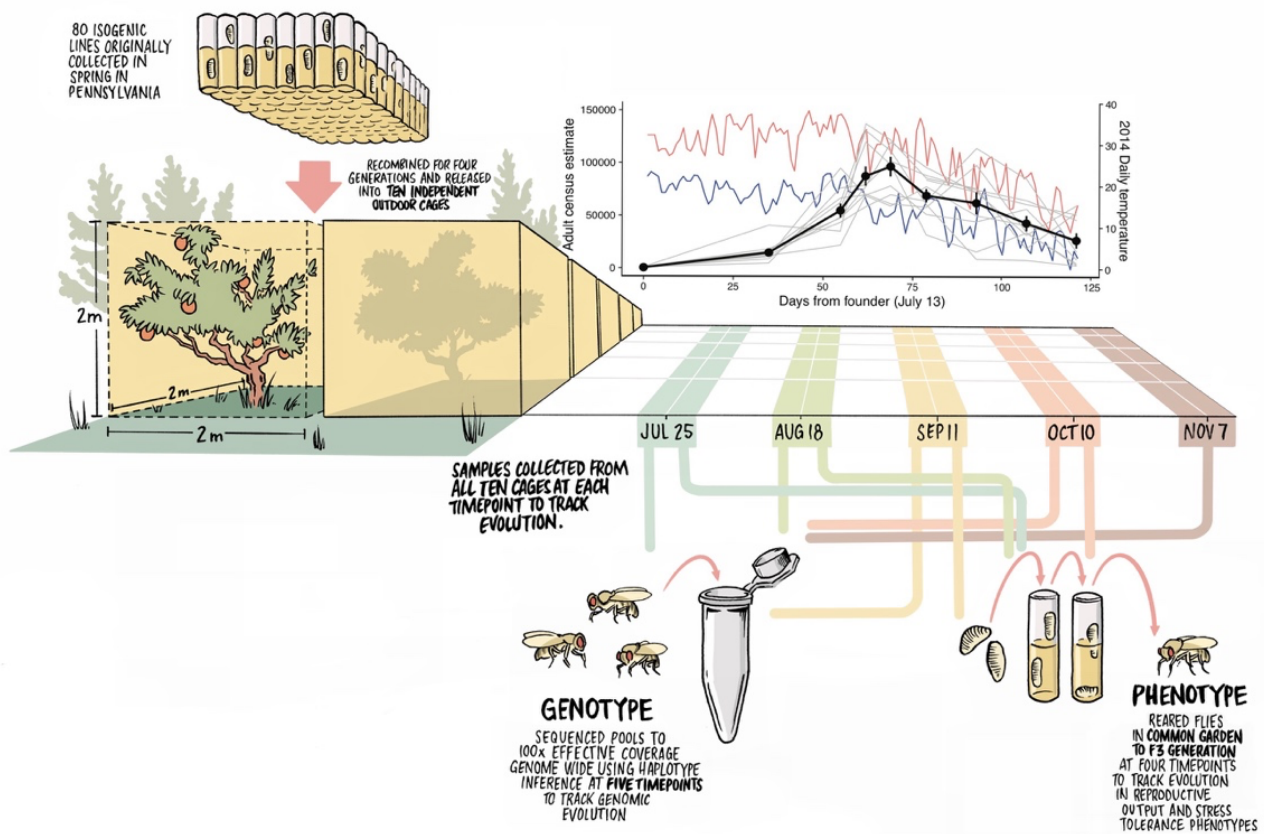

71  
72  
73  
74  
75  
76  
77  
78  
79  
80  
81  
82  
83  
84  
85  
86  
87  
88  
89  
90  
91  
92  
93  
94  
95

**Figure 1: Experimental arena, design, and population dynamics**

The experiment was designed to reflect ecological and evolutionary realism while testing for adaptation using replicate populations. 80 inbred lines originally collected in spring from an orchard in Pennsylvania were recombined and expanded for four generations into a genetically diverse outbred population in the laboratory. 500 males and 500 females from this outbred population were used to found 10 independent outdoor cages (2m x 2m x 2m). We measured daily minimum and maximum temperatures (blue and red lines, respectively) and estimated adult population size of each replicate over four months of seasonal change (mean: black line; per-replicate: gray lines). To study adaptation, we tracked phenotypic evolution by collecting eggs from each replicate, rearing them in common garden laboratory conditions for three generations, and then measuring six fitness-associated phenotypes. We conducted this procedure on the founder population and at four subsequent time points to measure phenotypic evolution over time. To study adaptation at the genomic level we sequenced pools of 100 females from each cage to >100x effective coverage at five time points using haplotype inference [20] and assessed changes in allele frequencies.

Population dynamics were largely consistent among the replicates; population size increased sharply during summer, peaked in early fall, and then declined steadily as minimum daily temperatures declined in late fall (Fig. 1). These population dynamics mimic the patterns observed in *D. melanogaster* populations (21) and many other multivoltine organisms inhabiting temperate natural environments, with summer exponential growth, high densities in late summer to early fall, and late fall population declines. Egg production showed a similar pattern (Fig. S1), albeit at greater numbers, and overall recruitment from egg to adult was low (Fig. S2). Similarity in the ecological conditions among replicate populations, including abiotic factors (Fig. S3) and population dynamics (Fig. 1), suggests similar selective landscapes may have driven parallel evolution across replicates.

Phenotypic evolution was rapid and parallel, but temporal patterns varied across traits. In order to

96 measure phenotypic evolution, we sampled individuals from the founding population and ~2,500 eggs  
97 from each cage at the first four time points (July 25, August 18, September 11, October 10), reared them  
98 in common garden laboratory condition for three generations, and assayed phenotypes in the F3 progeny  
99 (Fig. 1). For all six phenotypes, which are known to be polygenic and associated with fitness (22), we  
100 observed substantial trait evolution with an average of 23% change in the mean trait value for each cage  
101 across all phenotypes over each time interval. Variation in environmental parameters among cages did not  
102 implicate any individual factors as agents of selection (Fig. S4), perhaps due to the limited variation  
103 between cages or the complexity of the selective landscape. Prior experiments conducted in these  
104 mesocosms have found evidence of rapid adaptation in response to experimentally manipulated agents of  
105 divergent selection (10, 19).  
106

107 All six phenotypes showed evidence of parallel evolution, indicative of adaptation, over time. Four of six  
108 phenotypes evolved rapidly, repeatedly, and in a consistent direction across the duration of the experiment  
109 (Fecundity:  $F_{3,27}=43.75$ ,  $p<0.0001$ ; Egg size:  $F_{3,27}=11.5$ ,  $p<0.0001$ ; Starvation:  $F_{4,36}=129.05$ ,  $p<0.0001$ ;  
110 Chill coma recovery:  $F_{4,36}=197.75$ ,  $p<0.0001$ ) (Fig. 2). The magnitude of change was often substantial:  
111 for example, the average increase in fecundity was 61% over each monthly sampling interval across  
112 replicates, representing 1-4 overlapping generations. Desiccation tolerance and development rate also  
113 evolved rapidly and in parallel ( $F_{4,36}=86.66$ ,  $p<0.0001$  Fig. 2C;  $F_{4,36}=98.70$ ,  $p<0.0001$ , Fig. 2F), but the  
114 direction of evolution varied over time. Fluctuations in the direction of evolution for these phenotypes had  
115 considerable effects on phenotypic trajectories; for desiccation tolerance the amount of evolution  
116 measured over the whole experiment (founder to October 10th) was less than what was observed over the  
117 first interval (founder to July 25th). Identifying the fitness effects of any specific instance of phenotypic  
118 evolution is complicated by underlying correlations among traits, pleiotropy, and an unknown and  
119 potentially temporally variable phenotype-to-fitness map but the pace and parallelism of phenotypic  
120 evolution is suggestive of strong links to fitness.  
121

122 The pace of parallel trait evolution observed over the short timescales examined in this study was  
123 unusually fast. As expected, we observed rapid parallel evolution when outbred laboratory populations  
124 were introduced into the field enclosures and adapted to the field environment (Founder  $\rightarrow$  T<sub>1</sub>). However,  
125 we also observed evidence of rapid adaptation between intervals in the enclosures for all six phenotypes,  
126 with some showing reversals in the direction of evolution across intervals (Fig. 2 C&F). The rate of  
127 phenotypic adaptation, calculated in Haldanes (phenotypic evolution in units of standard deviations of the  
128 trait per generation (23, 24)), was computed as a mean change across replicates for each phenotype over  
129 each interval and across the whole experiment (Fig. 2G). The rate of adaptation over the whole  
130 experiment ranged from moderate to extremely fast for different traits (0 - 0.8 Haldanes) (25). However,  
131 when calculated over each sampling interval, the rate of adaptation was often comparable or faster than  
132 the fastest known pace of phenotypic change measured in any prior field study or experiment (Fig. 2G).  
133

134 The pace, magnitude, and parallelism of the phenotypic evolution we observed is notable for three  
135 reasons. First, the evolutionary rates were calculated based on the phenotypic shifts of the F3 progeny in  
136 common garden conditions, thus excluding phenotypic plasticity as the driver of change. Second, because  
137 we focus only on the parallel phenotypic shifts across the cages, our estimates describe the rate of  
138 putatively adaptive phenotypic change. Third, these patterns of rapid adaptation were observed for  
139 multiple fitness-associated phenotypes, each with a complex and likely distinct genetic architecture (26).  
140 Overall, our results show that strong and temporally variable natural selection can consistently drive rapid  
141 and polygenic adaptation of multiple fitness associated phenotypes on the same timescale as the  
142 environmental change.  
143

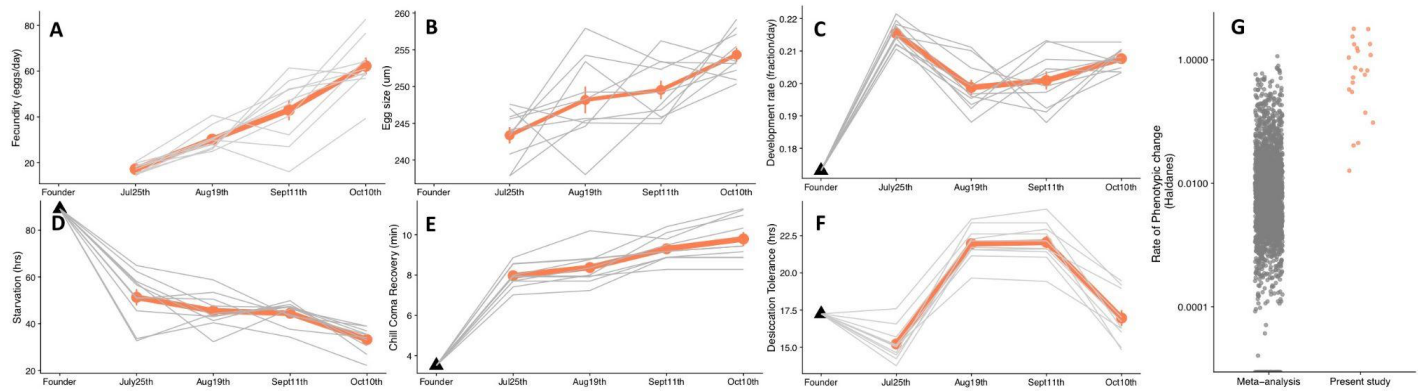

144

145

146

147

148

149

150

151

152

153

154

155

156

**Figure 2: Parallel evolution of stress tolerance traits, reproductive output traits, and comparison of the rate of adaptation.**

Trajectories of phenotypic evolution for reproductive-associated (A, B, C) and stress resistance traits (D, E, F) as measured after three generations of common garden rearing. Panel A: mean fecundity as number of eggs/female/day, Panel B: mean egg size, Panel C: development rate as the fraction of development to pupation completed in one day ( $1/(\text{total hours}/24)$ ). Panel D: starvation tolerance as time to death by starvation, Panel E: recovery time following chill coma, Panel F: desiccation tolerance as the time to death from desiccation. Black points are the mean phenotypes of the founding population, grey lines represent mean phenotypic trajectories of individual populations, and red lines are the mean of all cage means. Panel G: a comparison of the rates of adaptation from this experiment over individual intervals (red) to rates of phenotypic change from a prior meta-analysis (grey) [25].

157

158

159

160

161

162

163

164

165

166

167

168

169

170

171

To investigate the genomic architecture underlying the observed rapid phenotypic adaptation, we performed whole-genome pooled sequencing of 100 randomly selected individuals from the baseline population and each replicate population at five timepoints across the experiment (Fig. 1). Allele frequencies at 1.9 M biallelic sites were inferred for each sample via haplotype inference using HAF-pipe [20] (Methods) at accuracy levels consistent with an ‘effective coverage’ of  $>100x$  (Supplementary Materials, Fig. S5, Table S2). This high-resolution dataset yielded strong evidence for rapid genome-wide evolution. Specifically, we observed that the genome-wide estimates of  $F_{ST}$  between the founder population and all five monthly timepoints (mean  $3.0 \pm 0.2 \times 10^{-3}$  standard error) exceeded expected margins of error based on technical and biological replicates ( $2.6 \pm 0.24 \times 10^{-4}$  and  $1.8 \pm 0.048 \times 10^{-3}$  respectively, t-test p-values  $< 2 \times 10^{-8}$ , Fig. 3A). Furthermore, divergence from the founder population changed significantly over time both genome-wide (Kruskal-Wallis p-value for difference in means across timepoints:  $p < 2.3 \times 10^{-5}$ ) and for individual chromosomes ( $p < 0.006$ , Fig. S6). Given the large population sizes (up to  $10^5$ ) it is unlikely that such substantial evolutionary change can be attributed solely to random genetic drift.

172

173

174

175

176

177

178

179

180

181

182

183

184

185

186

Further examination of the magnitude and direction of evolution across the 10 replicate cages showed substantial genomic adaptation, as defined by parallel, and thus deterministic, allele frequency shifts across replicate cages. To test for parallel shifts, we used a leave-one-out cross validation approach. For each monthly time interval ( $T_i \rightarrow T_{i+1}$ ;  $i = 1, 2, 3, 4$ ), we used a generalized linear model (GLM) to identify sets of SNPs whose frequency shifted significantly across the 9 training cages, and then tested whether shifts at those SNPs in the 10<sup>th</sup> left-out cage exceeded shifts at randomly-chosen matched control sites. Using this test, we found widespread parallel genomic adaptation for the first 3 sampling intervals (in 29 out of 30 leave one-out tests) (Fig. 3C). The pattern of parallelism was muted and evolution was more idiosyncratic in  $T_4 \rightarrow T_5$ . We also repeated the procedure for SNPs that shifted across the whole experiment ( $T_1 \rightarrow T_5$ ) and found a similarly strong signal of parallel adaptation (10 out of 10 tests). The magnitude of allele frequency shifts in each interval (2-8%) and over the whole experiment (2-5%) corresponds to very strong effective selection strength at the most parallel sites of  $\sim 10$ -50% per monthly interval (1-4 generations) (Materials and Methods). This pattern was largely repeated when analyzing sites from each chromosome individually (Fig. S7). In simulated populations with the same demographics as the experimental populations, allele frequency shifts of this magnitude were consistently achieved with

187 selection coefficients  $\leq 50\%$  on alleles spanning a wide range of initial frequencies over similar  
188 timescales (Supplementary Information; [Table S3](#)). The pronounced parallel shifts in allele frequency  
189 across independent populations demonstrate the strong action of natural selection.

190  
191 Our cross-validation analysis also yielded clear evidence of variation in the magnitude and direction of  
192 selection over time, consistent with the observed patterns of phenotypic evolution for some traits ([Fig. 2](#)).  
193 Specifically, the leave-one-out analysis and the time series genomic data allowed us to examine the full  
194 trajectory of alleles detected at any specific time interval ( $T_{\text{det}}$ ). We found that these alleles do often shift  
195 significantly more than alleles at control sites ([Fig 3C](#)) at other time intervals; however, the nature of these  
196 shifts varied over time. In some left-out cages and at some time intervals, alleles shifted in a direction  
197 consistent with their behavior during  $T_{\text{det}}$  (orange points); however, in other cases the direction flipped,  
198 resulting in significant reverse shifts (green points). Reverse shifts were strongest for sites with  $T_{\text{det}} =$   
199  $T_3 \rightarrow T_4$  (Aug  $\rightarrow$  Sept) during the time when populations expanded most rapidly and reached their  
200 maximum. These  $T_3 \rightarrow T_4$  parallel sites showed consistent shifts in the *opposite* direction during the  
201 preceding interval ( $T_2 \rightarrow T_3$ , July  $\rightarrow$  Aug) when the populations were still expanding. In many cages, these  
202 sites also shifted in the opposite direction during the subsequent ( $T_4 \rightarrow T_5$ , Oct  $\rightarrow$  Nov) interval when  
203 population sizes were declining. These patterns likely reflect the action of rapidly fluctuating selection  
204 over the 4 months of the experiment.

205  
206 With a complex and rapidly fluctuating selective landscape adaptation occurs over multiple timescales  
207 simultaneously and inferred rates of adaptation are dependent on the timescale of sampling [[13](#)]. Our  
208 results clearly illustrate the extent to which lower-resolution temporal sampling would obscure the  
209 inference of adaptive tracking. While sites identified during individual time intervals often showed median  
210 shifts of  $>2\%$  in a single month, the strongest parallel sites detected from lower-resolution sampling (i.e.,  
211 sampling only at  $T_1$  and  $T_5$ ) showed smaller monotonic shifts at each interval (on average,  $0.6\%$  per  
212 month). Moreover, the magnitude of this discrepancy varied widely over time. Taken together, these  
213 results underscore the value of high-resolution temporal sampling in revealing the existence of both  
214 temporally variable and temporally consistent directional selective forces.

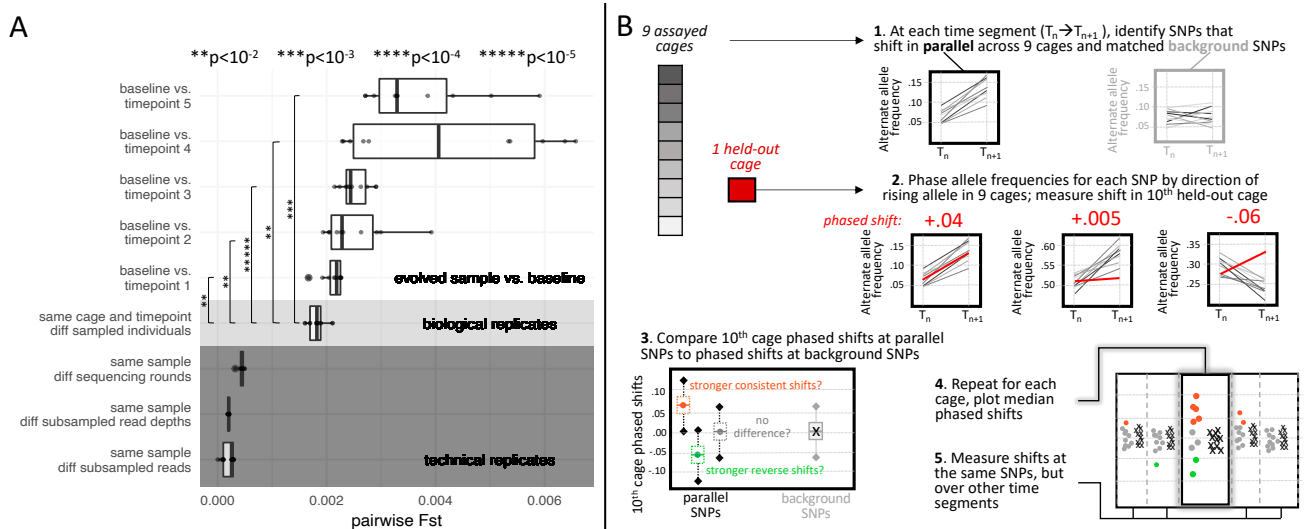

**Figure 3: Using genomic data to test for evolutionary parallelism indicative of adaptation.** A) Distributions of genome-wide mean pairwise Fst values between technical replicates (dark gray; same flies, different reads), biological replicates (light gray; different flies, same time point), and experimental samples from different timepoints compared to baseline (white). Note that negligible Fst values between pairs of technical replicates are consistent with extreme precision of HAFs, suggesting that the variance in allele frequency estimates for biological replicates is primarily driven by sampling of different individuals. Asterisks represent the significance of divergence over time compared to biological replicates (t-test). B) Graphical description of the leave-one out 10-fold cross-validation process for significant sites. In each round, significantly parallel sites (FDR <0.05, effect size >2%) at each time segment were identified using 9 of the 10 cages, then the shift at those sites in the 10<sup>th</sup> left-out cage was measured, after phasing such that positive values represent shifts in the same direction as the 9 assayed cages and negative values represent shifts in the reverse direction. The set of phased shifts at parallel sites was compared to phased shifts at background sites matched for chromosome and initial frequency and assigned to one of three significance bins: consistent (orange) or reverse (green), or no significant difference from background (gray). Shifts at these same sites over other time segments were also measured, phased, and assigned to significance bins. C) The median shift for each set of parallel sites (circles) and background sites (x marks) is plotted for each left-out cage. Each block of 5 panels represents shifts at the same sets of sites, those identified as parallel at the time segment labeled below the block. Shifts measured at that same time segment are highlighted in the panel with a dark shadowed outline.

The number and genomic location of causal loci involved in adaptation is central to understanding the mechanics of the adaptive process [27]. To quantify the genomic architecture of adaptation we examined the distribution of parallel sites across the genome and developed an algorithm to differentiate putatively independent targets of selection from the sites whose shifts could largely be ascribed to linkage disequilibrium and genetic draft. We first fit allele frequencies from all 10 cages to a GLM and identified significantly parallel sites (Fig. S8) at each time segment (n=4,274) and across the whole experiment (n=5,036), yielding 9,310 significant shifts overall (Fig. 4A, Table S4; Materials and Methods). As expected from the leave one-out analysis, the sets were largely non-overlapping: the 9,310 detected

241 parallel shifts occurred at 9,000 unique SNPs. Moreover, at each time interval and across the whole  
242 experiment, parallel sites were both strongly clustered (empirical  $p < 0.01$ ; [Fig. S9](#)) and showed  
243 significantly higher average linkage values than the matched control sites (paired t-test  $p$ -value  $< 10^{-16}$ ;  
244 [Fig. S10](#)) (Material and Methods), suggesting that most parallel sites were only linked to causal loci  
245 rather than being causal themselves.

246  
247 We next identified the minimum number of independent genetic loci under selection using an algorithm that  
248 aggregated the parallel sites into clusters of linked sites (Materials and Methods, [Fig. S10](#)). This algorithm clustered  
249 8,214 parallel SNPs detected across all the time segments ( $\sim 90\%$  of all SNPs at FDR  $< 0.05$ ) into 165 unlinked  
250 independent clusters ([Fig. 4A](#), [Table S5](#)). These clusters were found on every chromosome and at every time  
251 segment, with an average of 4.5 clusters per chromosome per month. Simulations confirmed that while interference  
252 among multiple causal sites can temper shifts at any individual site, the number of clusters detected here still falls  
253 well within the realm of plausible selection landscapes. Specifically, when allele frequency trajectories for pairs,  
254 groups of 5, or groups of 10 selected loci were simulated simultaneously on the same chromosome, the majority  
255 (61.5%) of simulated selected sites required selection strengths no greater than  $s = 0.5$  to achieve a minimum shift of  
256 2% per monthly time segment, and the vast majority (80.2%) required selection strengths no greater than  $s = 1$ .  
257 Furthermore, although inversions can drive patterns of adaptation in *Drosophila* [[28,29](#)], no inversion markers were  
258 found among the parallel sites, and only 3 of the 165 clusters were strongly linked to inversions with average  $R^2 >$   
259 0.1 ([Table S7](#), [Fig. S11](#)). Combining clusters from all time segments, 61% of all assayed SNPs and 62% of the  
260 genome was contained in at least one cluster, highlighting the pervasive impact of short-term adaptive evolution at  
261 tens to hundreds of independent selected sites on allele frequencies genome-wide.

262  
263 The genomic distribution and frequency shifts of these clusters suggested rapid changes in the targets and  
264 direction of selection over time. Specifically, 36 of the 90 clusters (40%) identified at a specific monthly  
265 time interval did not overlap any clusters identified at other monthly intervals, suggesting that selection at  
266 these loci was limited to one month. Among the remaining 54 clusters, only 27 (50%) contained SNPs  
267 that were significantly linked to SNPs in the cluster they overlapped. These 27 clusters formed 9 distinct  
268 ‘superclusters’ ([Fig. 4](#)) with high internal linkage, representing genomic regions in which allele  
269 frequencies shifted significantly in multiple monthly intervals. Strikingly, in 5 of the 6 superclusters  
270 involving a cluster from  $T_3 \rightarrow T_4$  linked to a cluster from  $T_4 \rightarrow T_5$ , 90% of SNPs flipped direction between  
271 months, and in the 6th cluster  $> 80\%$  flipped direction, together totaling 10,464 SNPs that flipped  
272 direction ([Fig. S12](#)). A smaller majority of SNPs (67%) flipped in the supercluster formed by a cluster  
273 from  $T_2 \rightarrow T_3$  linked to a cluster from  $T_3 \rightarrow T_4$ . Finally, in the two superclusters involving sets of linked  
274 clusters from 3 different time segments ( $T_2 \rightarrow T_3$ ,  $T_3 \rightarrow T_4$ ,  $T_4 \rightarrow T_5$ ), together covering over 5Mb of  
275 chromosome arm 3L, most SNPs (72% and 85%, respectively) flipped direction *twice*. We further  
276 confirmed that similar dynamics characterized the full set of putatively causal SNPs by choosing the SNP  
277 with the strongest parallelism  $p$ -value in each cluster and examining its trajectory ([Fig. 4B](#)). While the  
278 initial frequencies of these marker SNPs ([Fig. S13](#)) and exact shape of their trajectories varied widely, we  
279 observed a consistent trend: markers for the clusters identified at an individual monthly time interval  
280 often changed little during other months or even moved in the opposite direction (especially clusters  
281 identified at  $T_3 \rightarrow T_4$ ), whereas markers for clusters identified across the whole experiment tended to shift  
282 evenly and monotonically over time. The analysis of overlapping clusters and marker SNPs reveals  
283 similar patterns to individual SNP-based analyses, together supporting an oligogenic and rapid adaptive  
284 response to momentary selection pressures that often results in strong and rapidly fluctuating selection.

285



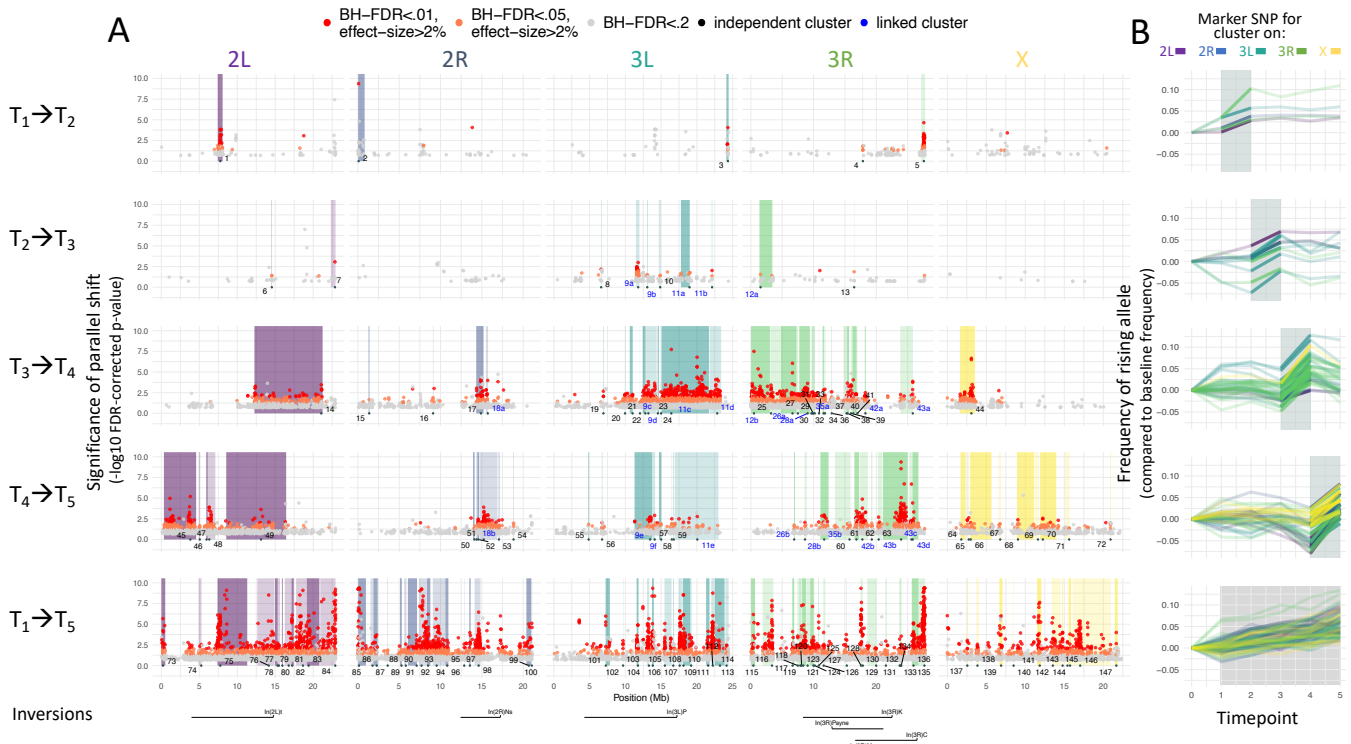

286  
 287 **Figure 4: The genomic architectures of parallel allele frequency change over time.** A) Manhattan plot of sites with  
 288 significant parallel allele frequency shifts over time in 10 replicate cages. Each dot shows the  $-\log_{10}$  of the FDR-corrected p-  
 289 value (y-axis) corresponding to the significance of the allele frequency shift at a given SNP position (x-axis) over a given time  
 290 segment of the experiment (rows). Only SNPs with an FDR  $< 0.2$  are shown, and dots are colored according to 3 significance  
 291 bins (top legend). Shaded areas indicate regions of the genome that are likely driven by the same causal site, as defined by a  
 292 clustering algorithm accounting for SNP linkage. Each clustered genome block is identified by a number marking the position  
 293 of the top parallel SNP. Clusters from different time segments that are significantly linked ('superclusters') are given the same  
 294 number, labeled in blue. The position of seven common chromosomal inversions are indicated below. B) Allele frequency  
 295 trajectories are shown for the top marker SNP from each cluster. Each trajectory is translated to show allele frequency change  
 296 relative to initial frequency in the baseline population, and phased to show the frequency of the rising allele at the time  
 297 segment in which the cluster was identified. The time segment over which the SNPs were identified as outliers is shaded in  
 298 gray.

300 We next tested whether the identified genomic targets of this rapidly fluctuating selection are associated  
 301 with any specific phenotypic traits or pathways. We specifically investigated the set of 111 genes - one  
 302 per cluster - that overlapped with the cluster's top marker SNP. This set of genes is strongly enriched ( $P$   
 303  $< 0.001$  in all cases) for genes with a known phenotypic effect (85 genes), and more specifically for  
 304 genes involved in behavior (27 genes), cell-to-cell signaling (34 genes), neuronal function (25 genes) -  
 305 and even more specifically, synaptic function (14 genes), and the CNS (21 genes) (Table S6). Many of  
 306 these genes are crucial to core developmental and signaling pathways including the Wnt signaling  
 307 pathway (genes *frizzled2* (the receptor of *wingless*), *armadillo* (beta-catenin), *sgg* (GSK3), *flo2* (long  
 308 range Wnt signaling), *reck* (regulation of Wnt signaling), *huwel* (negative regulation of Wnt signalling)),  
 309 and dpp/BMP signaling (gene *tkv*). Strikingly, one cluster marker SNP is found in *SNF4A $\gamma$* , the gamma  
 310 subunit of the central metabolic switch kinase Adenosine 5'-monophosphate-activated protein kinase  
 311 (AMPK). *SNF4A $\gamma$*  was one of two key genes found previously to be involved in adaptation to high  
 312 temperature during experimental evolution of a sibling species, *D. simulans* (30). On balance these  
 313 patterns suggest that the adaptive tracking in our outdoor mesocosms may be driven by the modulation of  
 314 sensing and regulatory processes at the level of the nervous system, metabolism, and development that  
 315 modify the way environmental cues are interpreted by the organism.

316

317 The phenotypic and genomic patterns observed in this study are consistent with a form of adaptive  
318 tracking in which (i) populations adapt in response to continuous environmental shifts, (ii) parallel  
319 evolution is driven by strong selection on multiple phenotypes and on a substantial number (tens to  
320 hundreds) of strongly selected genetic variants, (iii) the identity of the phenotypes and variants under  
321 selection changes considerably over short timescales, and (iv) selection operates at multiple timescales,  
322 acting in a consistent direction across the whole experiment on some variants and phenotypes, and  
323 rapidly fluctuating in direction and magnitude at others (31). This fluctuating selection leads to inferred  
324 rates of adaptation being slower when measured from the beginning to the end of the experiment as  
325 compared to single monthly intervals. The observed pattern that evolutionary rates are fastest when  
326 measured over shorter timescales may be driven by fluctuating selection (13, 32).

327

328 The pace, complex architecture of adaptation, and temporal evolution of particular phenotypes in our  
329 field cages are generally consistent with prior observations of seasonal evolution in natural temperate  
330 populations of *D. melanogaster* (21, 33–35). However, with additional temporal resolution and  
331 replication we detect rapidly fluctuating patterns of adaptation that suggest that populations of *D.*  
332 *melanogaster* are continuously and adaptively tracking the environment; this is surprising, but as we  
333 show not implausible given the timescale of environmental change (36). These patterns also imply that  
334 segregating functional variation is abundant and that much of the segregating variation in fitness is likely  
335 due to balancing selection (37), including temporally fluctuating selection that maintains genetic  
336 variation (14, 38, 39). The functional analysis of the genomic regions under selection further suggests  
337 that the rapid adaptation detected here is likely driven by modulation of high-level signaling pathways  
338 that feed into developmental and neuronal functions capable of modifying multiple phenotypes in a  
339 coordinated fashion. This may explain how selection can rapidly modify so many ostensibly unrelated  
340 phenotypes at the same time.

341

342 We show that it is possible to observe adaptive tracking in real time, providing a new lens to study the  
343 synchronous ecological and evolutionary dynamics of natural populations. We focus here on *D.*  
344 *melanogaster*, but the environmental and organismal features that gave rise to adaptive tracking, such as  
345 the presence of strongly shifting environmental pressures on generational time scales, are likely common  
346 (7, 8, 40, 41). Understanding the complex interplay among environmental change, population dynamics,  
347 standing genetic variation, and trait architecture that dictates the extent of adaptive tracking is a  
348 considerable challenge. Determining whether adaptive tracking is a general feature of natural populations  
349 and defining the factors that shape the extent of adaptive tracking could be transformative in  
350 understanding the generation and maintenance of biodiversity.

351

352

353 **REFERENCES**

- 354 1. L. B. Slobodkin, *Growth and regulation of animal populations* (Dover Publications., 1980).
- 355 2. A. Charmantier, R. H. McCleery, L. R. Cole, C. Perrins, L. E. B. Kruuk, B. C. Sheldon, Adaptive
- 356 phenotypic plasticity in response to climate change in a wild bird population. *Science*. **320**, 800– 803
- 357 (2008).
- 358 3. A. M. Simons, Modes of response to environmental change and the elusive empirical evidence for bet
- 359 hedging. *Proc. Biol. Sci.* **278**, 1601–1609 (2011).
- 360 4. D. N. Reznick, F. H. Shaw, F. H. Rodd, R. G. Shaw, Evaluation of the rate of evolution in natural
- 361 populations of guppies (*Poecilia reticulata*). *Science*. **275**, 1934–1937 (1997).
- 362 5. P. R. Grant, B. R. Grant, Unpredictable evolution in a 30-year study of Darwin’s finches. *Science*. **296**,
- 363 707–711 (2002).
- 364 6. N. G. Hairston, S. P. Ellner, M. A. Geber, T. Yoshida, J. A. Fox, Rapid evolution and the convergence
- 365 of ecological and evolutionary time. *Ecol. Lett.* **8**, 1114–1127 (2005).
- 366 7. R. D. H. Barrett, S. M. Rogers, D. Schluter, Natural selection on a major armor gene in threespine
- 367 stickleback. *Science*. **322**, 255–257 (2008).
- 368 8. R. D. H. Barrett, S. Laurent, R. Mallarino, S. P. Pfeifer, C. C. Y. Xu, M. Foll, K. Wakamatsu, J. S.
- 369 Duke-Cohan, J. D. Jensen, H. E. Hoekstra, Linking a mutation to survival in wild mice. *Science*. **363**,
- 370 499–504 (2019).
- 371 9. D. J. Rennison, S. M. Rudman, D. Schluter, Genetics of adaptation: Experimental test of a biotic
- 372 mechanism driving divergence in traits and genes. *Evolution Letters*. **3**, 513–520 (2019).
- 373 10. S. M. Rudman, S. Greenblum, R. C. Hughes, S. Rajpurohit, O. Kiratli, D. B. Lowder, S. G. Lemmon,
- 374 D. A. Petrov, J. M. Chaston, P. Schmidt, Microbiome composition shapes rapid genomic adaptation of
- 375 *Drosophila melanogaster*. *Proc. Natl. Acad. Sci. U. S. A.* **116**, 20025– 20032 (2019).
- 376 11. J. B. S. Haldane, The cost of natural selection. *Journal of Genetics*. **55**, 511–524 (1957).
- 377 12. E. A. Boyle, Y. I. Li, J. K. Pritchard, An Expanded View of Complex Traits: From Polygenic to
- 378 Omnigenic. *Cell*. **169**, 1177–1186 (2017).
- 379 13. P. D. Gingerich, Rates of Evolution - Effects of Time and Temporal Scaling. *Science*. **222**, 159–161
- 380 (1983).
- 381 14. M. Turelli, N. H. Barton, Polygenic variation maintained by balancing selection: pleiotropy, sex
- 382 dependent allelic effects and G x E interactions. *Genetics*. **166**, 1053–1079 (2004).
- 383 15. R. C. Lewontin, *The genetic basis of evolutionary change* (Columbia University Press New York,
- 384 1974), vol. 560.
- 385 16. M. T. Kinnison, N. G. Hairston Jr, A. P. Hendry, Cryptic eco-evolutionary dynamics. *Ann. N. Y.*
- 386 *Acad. Sci.* **1360**, 120–144 (2015).
- 387 17. D. Schluter, L. Nagel, Parallel speciation by natural selection. *American Naturalist*. **146**, 292–301
- 388 (1995).
- 389 18. S. Rajpurohit, E. Gefen, A. O. Bergland, D. A. Petrov, A. G. Gibbs, P. S. Schmidt. Spatiotemporal
- 390 dynamics and genome-wide association genome-wide association analysis of desiccation tolerance in
- 391 *Drosophila melanogaster*. *Mol. Ecol.* **27**, 3525–3540 (2018).
- 392 19. T. N. Grainger, S. M. Rudman, P. Schmidt, J. M. Levine, Competitive history shapes rapid evolution
- 393 in a seasonal climate. *Proc. Natl. Acad. Sci. U. S. A.* **118** (2021),
- 394 20. S. Tilk, A. Bergland, A. Goodman, P. Schmidt, D. Petrov, S. Greenblum, Accurate Allele frequencies
- 395 from ultra-low coverage pool-seq samples in evolve-and-resequence experiments. *G3*. **9**, 4159–4168
- 396 (2019).
- 397 21. E. L. Behrman, S. S. Watson, K. R. O’Brien, M. S. Heschel, P. S. Schmidt, Seasonal variation in life
- 398 history traits in two *Drosophila* species. *J. Evol. Biol.* **28**, 1691–1704 (2015).
- 399 22. T. Flatt, Life-History Evolution and the Genetics of Fitness Components in *Drosophila melanogaster*.
- 400 *Genetics*. **214**, 3–48 (2020).

- 401 23. J. B. S. Haldane, Suggestions as to quantitative measurement of rates of evolution. *Evolution*. **3**, 51–  
402 56 (1949).
- 403 24. P. D. Gingerich, Quantification and comparison of evolutionary rates. *Am. J. Sci.* **293**, 453–478  
404 (1993).
- 405 25. A. P. Hendry, T. J. Farrugia, M. T. Kinnison, Human influences on rates of phenotypic change in  
406 wild animal populations. *Mol. Ecol.* **17**, 20–29 (2008).
- 407 26. T. F. C. Mackay, S. Richards, E. A. Stone, A. Barbadilla, J. F. Ayroles, D. Zhu, S. Casillas, Y. Han,  
408 M. M. Magwire, J. M. Cridland, M. F. Richardson, R. R. H. Anholt, M. Barrón, C. Bess, K. P.  
409 Blankenburg, M. A. Carbone, D. Castellano, L. Chaboub, L. Duncan, Z. Harris, M. Javaid, J. C.  
410 Jayaseelan, S. N. Jhangiani, K. W. Jordan, F. Lara, F. Lawrence, S. L. Lee, P. Librado, R. S. Linheiro, R.  
411 F. Lyman, A. J. Mackey, M. Munidasa, D. M. Muzny, L. Nazareth, I. Newsham, L. Perales, L.-L. Pu, C.  
412 Qu, M. Ràmia, J. G. Reid, S. M. Rollmann, J. Rozas, N. Saada, L. Turlapati, K. C. Worley, Y.-Q. Wu,  
413 A. Yamamoto, Y. Zhu, C. M. Bergman, K. R. Thornton, D. Mittelman, R. A. Gibbs, The *Drosophila*  
414 *melanogaster* Genetic Reference Panel. *Nature*. **482**, 173–178 (2012).
- 415 27. J. Stapley, J. Reger, P. G. D. Feulner, C. Smadja, J. Galindo, R. Ekblom, C. Bennison, A. D. Ball, A.  
416 P. Beckerman, J. Slate, Adaptation genomics: the next generation. *Trends Ecol. Evol.* **25**, 705–712  
417 (2010).
- 418 28. T. Dobzhansky, Genetics of natural populations; altitudinal and seasonal changes produced by natural  
419 selection in certain populations of *Drosophila persimilis*. *Genetics*. **33**, 158–176 (1948).
- 420 29. M. Kapun, T. Flatt, The adaptive significance of chromosomal inversion polymorphisms in  
421 *Drosophila melanogaster*. *Mol. Ecol.* **28**, 1263–1282 (2019).
- 422 30. F. Mallard, V. Nolte, R. Tobler, M. Kapun, C. Schlötterer, A simple genetic basis of adaptation to a  
423 novel thermal environment results in complex metabolic rewiring in *Drosophila*. *Genome Biol.* **19**, 119  
424 (2018).
- 425 31. G. Bell, Fluctuating selection: the perpetual renewal of adaptation in variable environments. *Philos.*  
426 *Trans. R. Soc. Lond. B Biol. Sci.* **365**, 87–97 (2010).
- 427 32. A. P. Hendry, M. T. Kinnison, Perspective: The pace of modern life: measuring rates of  
428 contemporary microevolution. *Evolution*. **53**, 1637–1653 (1999).
- 429 33. P. S. Schmidt, D. R. Conde, Environmental heterogeneity and the maintenance of genetic variation  
430 for reproductive diapause in *Drosophila melanogaster*. *Evolution*. **60**, 1602–1611 (2006).
- 431 34. A. O. Bergland, E. L. Behrman, K. R. O'Brien, P. S. Schmidt, D. A. Petrov, Genomic Evidence of  
432 Rapid and Stable Adaptive Oscillations over Seasonal Time Scales in *Drosophila*. *PLoS Genet.* **10**,  
433 e1004775 (2014).
- 434 35. H. E. Machado, A. O. Bergland, R. Taylor, S. Tilk, E. Behrman, K. Dyer, D. K. Fabian, T. Flatt, J.  
435 González, T. L. Karasov, B. Kim, I. Kozeretska, B. P. Lazzaro, T. J. Merritt, J. E. Pool, K. O'Brien, S.  
436 Rajpurohit, P. R. Roy, S. W. Schaeffer, S. Serga, P. Schmidt, D. A. Petrov, Broad geographic sampling  
437 reveals the shared basis and environmental correlates of seasonal adaptation in *Drosophila*. *Elife*. **10**  
438 (2021).
- 439 36. C. A. Botero, F. J. Weissing, J. Wright, D. R. Rubenstein, Evolutionary tipping points in the capacity  
440 to adapt to environmental change. *Proc. Natl. Acad. Sci. U. S. A.* **112**, 184–189 (2015).
- 441 37. B. Charlesworth, Causes of natural variation in fitness: evidence from studies of *Drosophila*  
442 populations. *Proc. Natl. Acad. Sci. U. S. A.* **112**, 1662–1669 (2015).
- 443 38. M. J. Wittmann, A. O. Bergland, M. W. Feldman, P. S. Schmidt, D. A. Petrov, Seasonally fluctuating  
444 selection can maintain polymorphism at many loci via segregation lift. *Proc. Natl. Acad. Sci. U. S. A.*  
445 **114**, E9932–E9941 (2017).
- 446 39. J. Bertram, J. Masel, Different mechanisms drive the maintenance of polymorphism at loci subject to  
447 strong versus weak fluctuating selection. *Evolution*. **73**, 883–896 (2019).
- 448 40. A. Garcia-Elfring, A. Paccard, T. J. Thurman, B. A. Wasserman, E. P. Palkovacs, A. P. Hendry, R. D.

449 H. Barrett, Using seasonal genomic changes to understand historical adaptation to new environments:  
450 Parallel selection on stickleback in highly-variable estuaries. *Mol. Ecol.* **30**, 2054– 2064 (2021).  
451 41. M. A. Ehrlich, D. N. Wagner, M. F. Oleksiak, D. L. Crawford, Polygenic selection within a single  
452 generation leads to subtle divergence among ecological niches. *Genome Biol. Evol.* **13** (2021).

453  
454 **Acknowledgements:** We thank Andrew Berry, Moi Exposito-Alonso, Hunter Fraser, Dan Hartl,  
455 Jonathan Levine, Erin Mordecai, Dolph Schluter, and members of the Kelley and Cornejo labs, the King  
456 lab, the Petrov lab, the Schmidt lab, and two anonymous reviewers for helpful comments and discussions.

457 **Funding:** This work was supported by National Institutes of health grants R01GM100366 and  
458 R01GM137430 to PS and National Institutes of Health grant R35GM118165 to DAP.

459 **Author Contributions:** P.S. designed research. S.R., N.J.B., J.H. and P.S. conducted the experiment.  
460 T.Y and S.T. prepared sequencing libraries. S.M.R., S.I.G, D.A.P., and P.S. analyzed data, S.M.R, S.I.G,  
461 D.A.P, and P.S. wrote and revised the manuscript.

462 **Data and Code accessibility:** Sequenced founder lines can be found at XXX. Sequencing data from  
463 evolved cages can be found at XXX. Scripts for the genomic analysis and simulations can be found at:  
464 <https://github.com/greensii/dros-adaptive-tracking>.

465

## 1 SUPPLEMENTARY INFORMATION

### 2 Materials and Methods

3 Table S2, S4, S5, S7 (see attached excel file for Tables S1, S3, and S6)

4 Fig S1 – S13

5

### 6 **Materials and Methods**

#### 7 *Establishment of experimental populations*

8 To examine the pace, magnitude, parallelism, and genomic architecture of adaptation in  
9 response to a temporally variable environment we created a genetically diverse founder  
10 population that was seeded into each outdoor replicate. This outbred founder population  
11 was constructed from 80 fully sequenced *Drosophila melanogaster* inbred lines to  
12 facilitate the use of haplotype inference to attain high effective sequencing coverage.  
13 These inbred lines were derived from wild-caught individuals collected June 1, 2012  
14 from Linvilla Orchards, Media PA USA (1). Each line was subsequently inbred for 20  
15 generations by full-sib mating during which time they were maintained at 25 °C and fed  
16 ‘Spradling Cornmeal Recipe’ media. Then, 30-50 individuals from each line were  
17 pooled for whole genome sequencing. Sequencing and variant calling were performed as  
18 described in (2), with the addition that genomic DNA from certain lines was resequenced  
19 on an Illumina HiSeq X to increase coverage to a minimum of 10x for all lines. Mapped  
20 and de-duplicated bam files from all original and resequencing runs can be found on  
21 SRA under BioProject PRJNA722305 (Table S1). To initiate the baseline population in  
22 this experiment, we combined 10 males and 10 females from each of the 80 lines into  
23 large cages in May 2014. We allowed 4 generations of unmanipulated recombination  
24 and population expansion to facilitate recombination between lines before using 500  
25 males and 500 female flies to found each of 10 field cages. Inbred lines have many  
26 deleterious alleles; purifying selection against deleterious alleles fixed during inbreeding  
27 was likely strong during lab outcrossing, and potentially, the early phase of the  
28 experiment.

29

30 Each field cage is a 2m x 2m x 2m mesh enclosure around a dwarf peach tree located outdoors  
31 (Philadelphia, PA) and features a natural insect and microbial community. The ground was fresh  
32 soil with clover planted as ground cover in each cage. The only food source and egg-laying  
33 substrate was 400ml of *Drosophila* media (‘Spradling cornmeal recipe’) contained in 900cm<sup>3</sup>  
34 aluminum loaf pans that were added every second day for the duration of the experiment (July  
35 13th - November 7th, 2014). Loaf pans of media within experimental cages were protected from  
36 rain and direct sun on shelving units oriented away from direct sunlight.

#### 37 *Measurement of population size and evolution of fitness associated phenotypes*

38 Census size of adults was estimated in each replicate over the course of the experiment by  
39 photographing an equal amount of the surface area (approximately 2.5%) of the ceiling in each  
40 cage at dusk (12 total census estimates per cage). The number of adult *D. melanogaster* in  
41 each of 8 standardized photographs in each estimate for each cage was counted and multiplied  
42 by 40 to correct for total surface area and obtain census estimates. Egg production was  
43 estimated every second day by counting the eggs present on a 1/24<sup>th</sup> portion of the exposed  
44 surface of the media.

45  
46 To assess the rate and direction of phenotypic evolution over the course of the experiment we  
47 collected ~2500 eggs from each cage, brought them to the laboratory, and reared them for an  
48 additional 2 generations in a common garden (25°C, 12L:12D) while maintaining population  
49 sizes at ~2500 individuals. Fitness-associated phenotypes were measured on density and age-  
50 controlled replicates in the F3 generation. Fecundity was measured as the total number of eggs  
51 laid by a group of five females, counted each day for a period of three days, with twenty replicate  
52 vials for each cage at each time. Egg length was measured using a microscope and image  
53 processing software (3) on at least 15 eggs (average of 27) from each cage at each time point.  
54 Larval development rate was tracked as the time from when eggs were laid until pupation in  
55 three replicate vials from each cage at each time point with 30 eggs in each vial. Starvation  
56 tolerance was measured as time to starvation in three replicate vials containing moist cotton (1.5  
57 ml water) (following (4)) and 10 female flies with three replicates for each cage at each time  
58 point. Desiccation tolerance was measured as time to death in desiccation chambers containing  
59 10 female flies with three replicates for each cage at each time point (4). Chill coma recovery  
60 was measured as the time it took for flies buried in ice and placed in a 4°C incubator for 2h to  
61 resume an upright stance at 25°C (1). This was measured using groups of 10 female flies for each  
62 cage at each time point that had been allowed at least 24hrs to recover from light CO<sub>2</sub> anesthetic.  
63 We also attempted to measure evolution in heat knockdown. However, the assay temperature we  
64 used for the founder population, a stressor that caused 50% of flies to knockdown by 12 minutes,  
65 was not sufficiently hot to cause knockdown by the second sample period. Thus, although we  
66 cannot quantify it, heat tolerance evolved rapidly. We assayed each of the remaining phenotypes  
67 in the founding population (founder assays failed for fecundity and egg size) and at four times  
68 during the experiment: day 11 (7/25/14), day 38 (8/19/14), day 61 (9/11/14), and day 90  
69 (10/10/14). Census and phenotypic evolution data have been uploaded to Dryad.

70 *Calculation of evolutionary rates and statistical analysis of phenotypic data to test*  
71 *for evolutionary parallelism*

72 We calculated evolutionary rates in Haldanes by dividing the trait change over each interval by  
73 the pooled standard deviation and then by the number of generations elapsed (5,6). We  
74 calculated the rate of adaptation as the parallel change across replicates. To do so we took the  
75 average trait change across all 10 replicates and calculated a single rate in Haldanes. Haldanes  
76 were calculated for all six phenotypes for each experimental interval and over the whole  
77 experiment. We compared the rates of evolution measured in our experiment to those from a  
78 meta-analysis of evolutionary rates from field populations that focused on contemporary  
79 evolution (less than 200 generations) (7). The meta-analysis was focused on phenotypic change,  
80 which includes both genetic and environmental (plastic) effects, as few prior studies used  
81 common garden experiments to measure the rate of evolution.

82 To test for parallel phenotypic evolution in each of the six phenotypes we carried out separate  
83 linear mixed effect models (e.g. lme(phenotype measured ~ time, random=~1|cage/time)) and  
84 tested for significance using an anova (nlme and R respectively).

85 *Genomic sequencing, SNP calls, and bioinformatic analysis*

86 100 female flies from each of the 10 field cages were sampled at 5 monthly time points.  
87 Individuals from each sample were pooled and libraries were prepped using a Covaris protocol,

88 then size-selected using an e-gel. Two e-gel bands from each sample were sequenced separately  
89 (1 from the 450-500 band and 1 from the 500-550 band) on a HiSeq3000 with 150-bp paired-end  
90 reads. Truseq adapter sequences and bases with quality <20 were trimmed with skewer (8) and  
91 overlapping forward and reverse reads were merged using PEAR (9). Resulting reads were  
92 mapped to the *Drosophila melanogaster* reference genome v5.39 with BWA (default parameters)  
93 (10). Reads were deduplicated using Picardtools and realigned around indels using GATK v4  
94 (11). Pairs of bam files from the same sample were merged with samtools (12). Final average per-  
95 sample read depth was 7.3x +/- standard deviation of 2.0x. Haplotype-derived allele frequencies  
96 (HAFs) were then calculated via local inference with HAF-pipe (2) using the 80 genotyped  
97 founder strains. Haplotype inference was conducted in sliding windows across the genome, using  
98 the adaptive window size option in HAF-pipe to reflect the expected length of un-recombined  
99 haplotype blocks given the estimated number of generations since population founding.  
100 Heterozygous calls in the founder lines were included in the inference calculation, and missing  
101 calls were imputed using HAF-pipe's 'npute' option. HAFs from all samples were compiled and  
102 filtered to contain only sites at which at least one baseline sample and at least one evolved cage  
103 sample had a minor allele frequency >1%.

#### 104 *High coverage sequencing*

105 4 biological replicate samples from the baseline population, each a random sample of 100 flies  
106 from the same baseline population, were sequenced at high coverage. Baseline library preps  
107 were created using a modified Nextera protocol (11) and sequenced on a HiSeq4000 with target  
108 100x coverage. Additionally, timepoint-5 evolved samples from 8 of the 10 cages were re-  
109 sequenced at high coverage (in addition to separate sequencing at low coverage with the rest of  
110 the evolved samples) using a KAPA hyperprep and a HighSeq4000. Processing for both the  
111 baseline and high-coverage timepoint-5 samples followed the same workflow. All adapter  
112 sequences were trimmed with skewer (7) with default parameters and minimum quality Q=20.  
113 Overlapping forward and reverse reads were merged using PEAR (8). Resulting reads were  
114 mapped to the *Drosophila melanogaster* reference genome v5.39 with BWA (default  
115 parameters). Reads were deduplicated using Picardtools and realigned around indels using  
116 GATK v4. Raw allele frequencies at each SNP site were then calculated using Popoolation (12)  
117 and custom bash scripts.

#### 118 *Analysis of HAF accuracy*

119 Our approach relies on a previously published expectation-maximization algorithm for inferring  
120 the frequency of individual founder haplotype blocks in each pooled sample, which we then  
121 translate to population allele frequency estimates using weighted sums of founder genotypes.  
122 This approach was described in detail in (2), where we demonstrated via simulations that HAFs  
123 calculated from read depths ~5x can be as accurate as raw allele frequencies calculated from  
124 read depths >100x, and that high accuracy is maintained for >50 generations in *Drosophila*,  
125 although recombination does impact accuracy over time. As our experiment lasted only 10-15  
126 generations, we expected that this approach would yield reliable allele frequencies suitable for  
127 downstream analysis. In fact, using the predictive tool described in (2) ([https://ec-  
128 calculator.shinyapps.io/shinyapp/](https://ec-calculator.shinyapps.io/shinyapp/)) to predict the expected 'effective coverage' of our HAFs  
129 from experimental parameters, accuracy estimates ranged from 106x for the most shallowly  
130 sequenced sample on the X chromosome (where SNP density is lowest, leaving fewer



131 discriminatory sites for haplotype inference) to 369x for the deepest sequenced sample on  
132 chromosome 3R (Table S2).

133 However, to validate that HAF accuracy was sufficiently high with empirical (rather than  
134 simulated) data, and to confirm that this approach does not lead to biased estimates as  
135 recombination progresses, we re-sequenced 8 of the timepoint-5 samples at high-coverage and  
136 compared allele frequencies calculated from raw reads ('raw AFs'; i.e., calculated from the  
137 proportion of alternate alleles at each site, without haplotype inference) to HAFs calculated from  
138 the same samples. Importantly the raw AFs and HAFs were calculated from distinct sets of reads  
139 (different aliquots of genomic DNA from the same individuals), and were thus independent  
140 estimates. Furthermore, while neither HAFs nor raw AFs represent ground truth allele  
141 frequencies for the sampled individuals, they each contain different sources of error. Thus, we  
142 would expect that the accuracy of HAFs would be reflected in a strong correlation with raw AFs  
143 at the highest read depths, since they are both faithful representations of the same signal, while if  
144 HAFs were systematically biased, increasing the raw AF read depth would not improve the  
145 correlation. To test this, sites in all 8 samples were binned by their read depth in the high  
146 coverage version of each sample, and then 50,000 sites were sampled randomly from each bin  
147 across all samples. Fig S1A shows density heatmaps of allele frequencies vs HAFs calculated at  
148 the same site in the same sample for sites in 4 different read depth bins. We observed that as raw  
149 read depth increased, raw allele frequencies more closely matched HAFs, as apparent from lower  
150 variance around the diagonal in the heatmap and a stronger correlation coefficient. To further  
151 confirm that there was no systematic bias in HAFs compared to raw allele frequencies, we  
152 plotted the smoothed line of best fit (using the function `geom_smooth` from the `ggplot2` R  
153 package) separately for each read depth bin (Fig S1B). Indeed, for sites in the highest read depth  
154 bin, the line of best fit is almost exactly on the diagonal. Since our analysis relies not just on  
155 estimating allele frequencies correctly, but on detecting subtle shifts in allele frequency over  
156 time, we generated the same set of plots and correlations for the shift between baseline  
157 and timepoint 5 calculated from raw AFs vs HAFs (Fig. S1C-D). We observed the same pattern,  
158 in which concordance between raw AFs and HAFs improved with higher raw AF read depth,  
159 though the correlation coefficients overall were not as strong. These reduced correlation  
160 coefficients are expected given that the vast majority of shifts are very small and the dynamic  
161 range of values is reduced. Nevertheless, the consistent increase in correlation coefficient across  
162 read depth bins is consistent with HAF accuracy reaching effective coverages >115x (the highest  
163 read depths observed in the raw AFs). Finally, to assess the fine-scale resolution of HAFs, sites  
164 with raw read depth >115x and shifts <=10% were binned by raw AF shift to the nearest 1%,  
165 and boxplots were generated of HAF shifts at the sites in each bin (Fig S1E). The means of the  
166 HAF shifts in each bin rose significantly across each consecutive bin (all t-test p-values <.05),  
167 suggesting that HAFs provide the resolution necessary to distinguish shifts that differ by ~1%.

### 168 *Identifying significant parallel SNPs*

169 A generalized linear model (GLM) with a quasibinomial error model was fit to allele frequencies  
170 at each SNP to assess the parallelism of shifts in allele frequency across cages over each time  
171 interval. To account for sampling of chromosomes, all allele frequencies were first scaled and  
172 rounded to counts out of  $N_{\text{effective}}$ , where  $n$  is the number of individuals sampled from the  
173 population (100 for all samples),  $rd$  is the true read depth, and  $N_{\text{effective}} = 2n*rd - 1 / 2n + rd$ . A site  
174 was considered significantly parallel if it showed 1) at least 2% average change in allele

175 frequency over the time interval and 2) Benjamini-Hochberg false discovery rate corrected p-  
176 value  $<.05$  from the GLM test of parallelism. We also created an empirical false discovery rate  
177 correction by shuffling the sample time point labels and re-running GLMs, however this rate  
178 proved to be less stringent and therefore was not used in the analysis.

#### 179 *Leave-one out cross validation analysis*

180 In each round, a GLM was fit using allele frequencies from 9 training cages, and parallel sites  
181 were identified at each time segment as described above. For each parallel site, a matched  
182 control site was identified on the same chromosome that had an initial frequency in the baseline  
183 population within 5% of the parallel site. At each parallel and control site, the allele frequency  
184 shift over each time segment in the 10th left-out cage was calculated and phased such that a shift  
185 in the same direction as the training cages was given a positive sign and a shift in the opposite  
186 direction was given a negative sign. A t-test was conducted for each time segment to determine  
187 if the set of phased shifts at parallel sites was significantly different than shifts across all control  
188 sites. In Figure 3, we plotted the median phased shift for each set of sites at each time segment,  
189 and colored the point for parallel sites if the t-test p-value was  $< 0.05$  after false discovery rate  
190 correction.

191

#### 192 *Forward simulation of selection in replicate populations*

193 Simulations of allele frequency dynamics associated with rapid adaptation were performed with  
194 the software tool forqs (13), which simulates recombination of haplotype chunks in the presence  
195 of zero or more selected alleles in a randomly mating population over a specified number of non-  
196 overlapping generations. We first chose a set of 100 sites from across the allele frequency  
197 spectrum on which to focus our simulations. To do so, we divided all segregating sites in the  
198 experimental founder population into 100 equidistant bins according to their alternate allele  
199 frequency across the 80 founder lines, and then randomly selected 1 site from each bin. Then,  
200 separately for each site, we used forqs to simulate allele frequency trajectories from 10  
201 independent populations of 100,000 individuals over 3 generations of neutral ‘burn-in’ and 4  
202 generations of constant directed selection on one of these 100 sites. In each simulation, the  
203 100,000 individuals in each of the 10 populations were each assigned to carry the alleles of a  
204 randomly selected homozygous founder strain, which were supplied to forqs via an ms file.  
205 Simulations for each site were repeated with a range of selection coefficients between  $s=0.05$  and  
206  $s=1$ , in which homozygous reference, heterozygous, and homozygous alternate genotypes were  
207 assigned a selective advantage equal to 1,  $1+s/2$ , or  $1+s$  respectively. In each simulation we also  
208 tracked the frequency of neutral (ie  $s=0$ ) marker sites located approximately 5kb away from each  
209 selected site. Environmental variance between populations was set to 0.05. To be conservative, in  
210 our simulations we referred to the female *D. melanogaster* recombination rate map (14) for all  
211 individuals, and simulated truncation selection in which the top 25% of individuals contribute to  
212 the next generation. After simulating selection on each site individually, we then randomly  
213 grouped the sites into pairs, sets of 5 sites, and sets of 10 sites, and repeated the simulations with  
214 multiple sites under selection with the same strength, each contributing independently to a single  
215 additive trait. After simulation for each site or set of sites, allele frequencies at each selected site  
216 and each marker site were averaged across the 10 replicate populations and the minimum  
217 selection coefficient was identified at which average allele frequency shifted by at least 2% over  
218 the course of the 4 generations of selection. Results are presented in Table S3.

219 *Defining SNP clusters*

220 A GLM model was fit to allele frequencies from all 10 cages at each site as described above, to  
221 assess the parallelism of the shift over each time interval. Each site was assigned a score for each  
222 time interval according to the following criteria: 0 = [FDR >0.2], 1 = [FDR <.2 or FDR >.2 and  
223 effect size <2%], 2 = [FDR <.05, effect size >2%], 3 = [FDR <.01, effect size >2%]. While only  
224 sites receiving a score of 2 or 3 were defined as ‘significant’ in the analysis, lower scoring sites  
225 were helpful in identifying large regions of elevated parallelism. Average SNP scores were  
226 calculated for sliding windows of 500 SNPs (offset=100 SNPs), and significantly enriched  
227 windows were defined as those with an empirical FDR <.05 compared to the distribution of  
228 window scores obtained by randomly shuffling sites across the genome. Overlapping enriched  
229 windows were then merged. Next, linkage was calculated between all pairs of significant SNPs  
230 less than 3 Mb apart from the same time interval. Linkage was defined as the squared correlation  
231 coefficient from a Pearson correlation of founder genotypes at the two sites, with genotypes  
232 coded as 0, 0.5, 1, or NA for missing data. Neighboring windows with average SNP-pair linkage  
233 >0.03 were merged into clusters, and the process was repeated iteratively until no neighboring  
234 clusters within 3Mb exceeded an average linkage of 0.03.

235

236 *Defining superclusters*

237 A list was generated of all pairs of clusters identified at different time segments that overlapped  
238 by at least one SNP. Clusters identified across the whole experiment ( $T_1 \rightarrow T_5$ ) were excluded  
239 from this list, resulting in 44 pairs of overlapping clusters. For each pair of clusters, linkage ( $R^2$ )  
240 values between all inter-cluster pairs of significant SNPs within 3Mb of each other were  
241 calculated and compared to linkage values for a set of randomly selected control SNP pairs  
242 matched for chromosome, initial frequencies, and inter-SNP distance. If linkage values for the  
243 cluster SNPs were significantly higher than linkage values for the matched control SNPs  
244 (Benjamini-Hochsberg FDR-corrected t-test p-value <.05), the clusters were considered  
245 significantly linked. Any individual pairs of linked clusters that shared a cluster in common were  
246 merged into linked cluster sets to form the final list of superclusters.

247 *Assessing the influence of inversions*

248 Inversion markers ([15](#)) were used to assess the linkage of each cluster to each inversion on the  
249 same chromosome. Markers were filtered to SNPs segregating in our baseline population.  
250 Because subsets of markers for the same inversion often showed disparate allele frequency  
251 trajectories in our data (and thus may not be reliable markers of the inversion among the inbred  
252 lines used to found our population), we filtered markers for each inversion to those that showed  
253 strong linkage ( $R^2 > 0.5$ ) to at least half of the other markers for that inversion (see [Table S7](#) for  
254 inversion marker counts before and after filtering). We then calculated the linkage between all  
255 significantly parallel SNPs and any inversion markers up to 3Mb away.

256

257

258

259 *Supplementary Tables*

260 Table S1. List of inbred *Drosophila melanogaster* lines and SRA accession numbers used in this  
 261 study.

262 *(see excel spreadsheet)*

263 Table S2. Predicted effective coverage ('ec') calculated from the density of sites per  
 264 chromosome, percent of founder genotype calls that were missing, and the minimum, maximum,  
 265 and mean chromosome-wide average read depth across samples according to the model described  
 266 in (Tilk et al. 2019).

| chrom | sites  | chrLength | rd.min  | rd.max  | rd.mean  | pctMissing | ec.min   | ec.max   | ec.mean  |
|-------|--------|-----------|---------|---------|----------|------------|----------|----------|----------|
| 2L    | 445543 | 22959546  | 3.64173 | 13.1986 | 7.181742 | 3.463651   | 185.5358 | 362.3872 | 264.0956 |
| 2R    | 351513 | 21089956  | 3.70459 | 14.4459 | 7.477311 | 3.123645   | 181.7283 | 368.7166 | 261.8173 |
| 3L    | 427751 | 24441682  | 3.62860 | 13.3599 | 7.197246 | 3.654239   | 171.0436 | 336.8296 | 244.1984 |
| 3R    | 449342 | 27783920  | 3.69212 | 13.9909 | 7.374537 | 3.016083   | 184.5712 | 368.9514 | 264.4698 |
| X     | 244787 | 22356942  | 3.67772 | 13.1414 | 7.074860 | 5.471243   | 106.9219 | 207.3054 | 150.2429 |

267  
 268  
 269

270 Table S3. Results of forward simulations of selection over 4 generations. For each selected site  
 271 (left side) or marker site 5kb away (right side), the table lists the minimum selection coefficient  
 272 required to shift allele frequency by 2% when the selected site was the only site under selection  
 273 (first column), or was part of a multi-site selection regime (subsequent columns). NA indicates  
 274 that no selection strengths tested resulted in a sufficient parallel shift.

275 *(see excel spreadsheet)*

276  
 277  
 278  
 279

280 Table S4. Counts of sites with significant (FDR<.05, effect size >2%) parallel allele frequency  
 281 shift across 10 replicate cages at each time segment, on each chromosome.

| <b>Sig Site Count</b> | <b>2L</b> | <b>2R</b> | <b>3L</b> | <b>3R</b> | <b>X</b> | <b>Total</b> |
|-----------------------|-----------|-----------|-----------|-----------|----------|--------------|
| Timepoint 1 --> 2     | 42        | 4         | 6         | 67        | 4        | 123          |
| Timepoint 2 --> 3     | 4         | 0         | 109       | 5         | 0        | 118          |
| Timepoint 3 --> 4     | 178       | 109       | 1453      | 858       | 137      | 2735         |
| Timepoint 4 --> 5     | 306       | 156       | 93        | 642       | 101      | 1298         |
| Timepoint 1 --> 5     | 1294      | 1085      | 997       | 1146      | 514      | 5036         |
| Total                 | 1824      | 1354      | 2658      | 2718      | 756      | 9310         |
| Unique sites          | 1783      | 1326      | 2541      | 2602      | 748      | 9000         |
| % of All sites        | 0.4%      | 0.38%     | 0.59%     | 0.58%     | 0.31%    | 0.47%        |

282  
 283  
 284  
 285  
 286

Table S5. Counts of clusters identified at each time segment on each chromosome.

| <b>Cluster Count</b> | <b>2L</b> | <b>2R</b> | <b>3L</b> | <b>3R</b> | <b>X</b> | <b>All</b> |
|----------------------|-----------|-----------|-----------|-----------|----------|------------|
| Timepoint 1 --> 2    | 1         | 1         | 1         | 2         | 0        | 5          |
| Timepoint 2 --> 3    | 2         | 0         | 6         | 2         | 0        | 10         |
| Timepoint 3 --> 4    | 1         | 4         | 10        | 20        | 1        | 36         |
| Timepoint 4 --> 5    | 5         | 6         | 8         | 11        | 9        | 39         |
| Timepoint 1 --> 5    | 12        | 16        | 14        | 22        | 11       | 75         |
| All                  | 21        | 27        | 39        | 57        | 21       | 165        |

287

288  
 289

290 Table S6. Gene associations and annotations for the single marker SNP in each cluster with the  
 291 strongest parallelism score. Columns marked with an asterisk represent phenotypic associations  
 292 of marker genes obtained from <http://evol.nhri.org.tw/phenome2/> (Weng et al 2017).

293 *(see excel spreadsheet)*

294 Table S7. Table of inversion marker counts. Segregating markers could be detected as bi-allelic  
295 SNPs in the baseline population, while filtered markers showed high correlation ( $R^2>0.5$ ) with  
296 each other across all sampled cages during the course of the experiment.

| <b>Inversion</b> | <b>All Markers</b> | <b>Segregating Markers</b> | <b>Filtered Markers</b> |
|------------------|--------------------|----------------------------|-------------------------|
| In(2L)t          | 16                 | 16                         | 16                      |
| In(2R)Ns         | 67                 | 22                         | 19                      |
| In(3R)C          | 144                | 10                         | 0                       |
| In(3R)K          | 4                  | 1                          | 1                       |
| In(3R)Mo         | 150                | 73                         | 64                      |
| In(3R)Payne      | 19                 | 12                         | 11                      |

297

298

299

300

301 *Supplementary Figures*

302

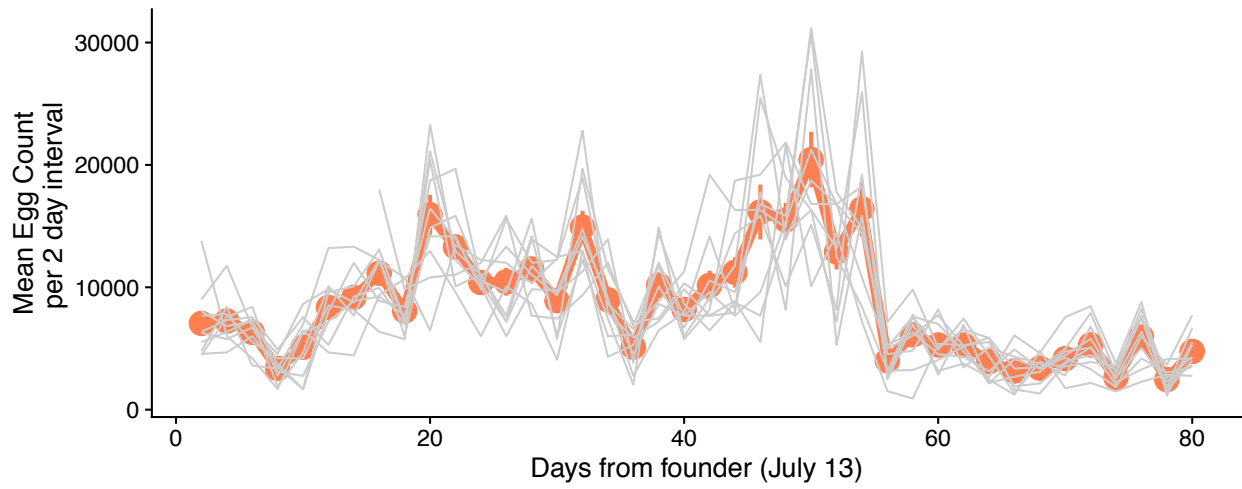

303

304

305 Fig. S1: Eggs were estimated by counting the number on 1/24<sup>th</sup> of the food loaf pan every second  
306 day during the experiment. Plotted here are the means (orange line) and individual cage value for  
307 egg production for each 2 day period.

308

309

310

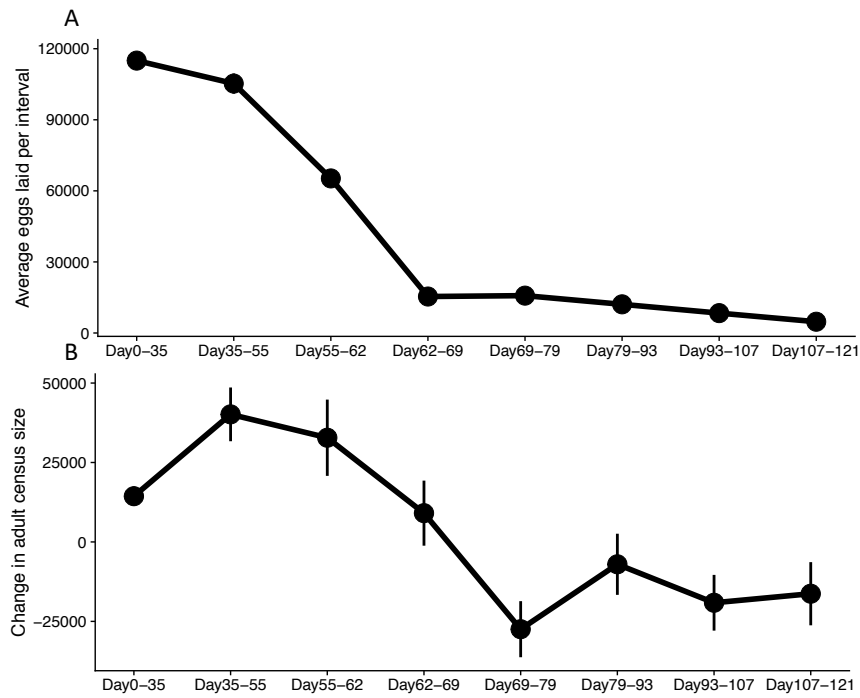

311

312 Figure S2: To visualize recruitment from egg to adult we have plotted: A) The total number of  
313 eggs that could have matured to adulthood between each adult census estimate B) The change in  
314 adult population size between each census estimate. For both A and B means with standard errors  
315 are plotted.  
316



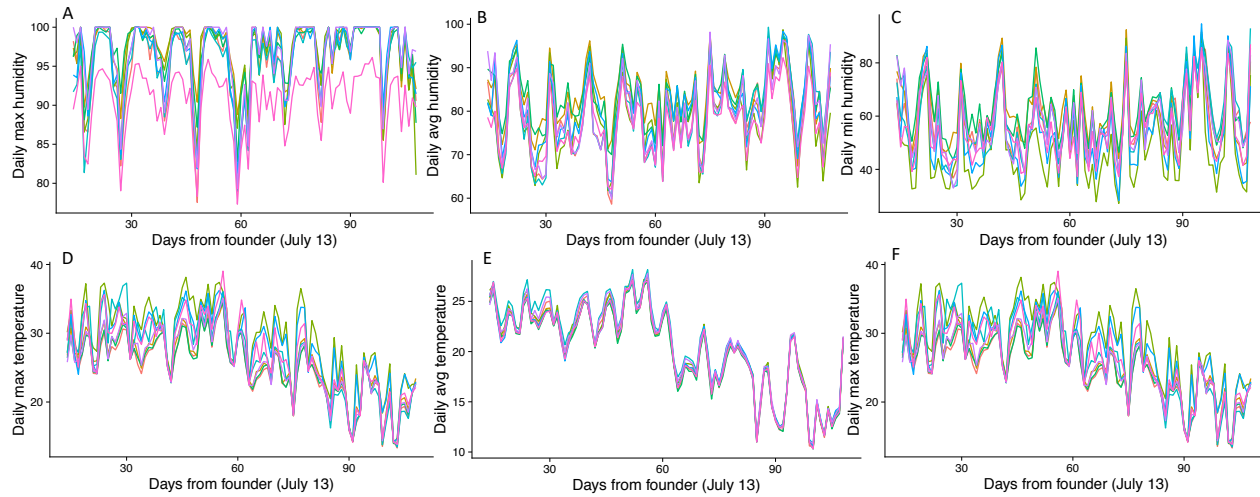

318  
 319 Figure S3: Panels A-C show cage by cage variation in daily relative humidity (A=maximum,  
 320 B=average, C=minimum). Panels D-F show cage by cage variation in daily temperature  
 321 (D=maximum, E=average, F=minimum). Temperature and humidity loggers in 8 of 10 cages  
 322 collected complete data and are included here. Cage level variation is modest overall,  
 323 maintaining the expectation that independent replicate populations may show parallel  
 324 evolutionary trajectories.  
 325

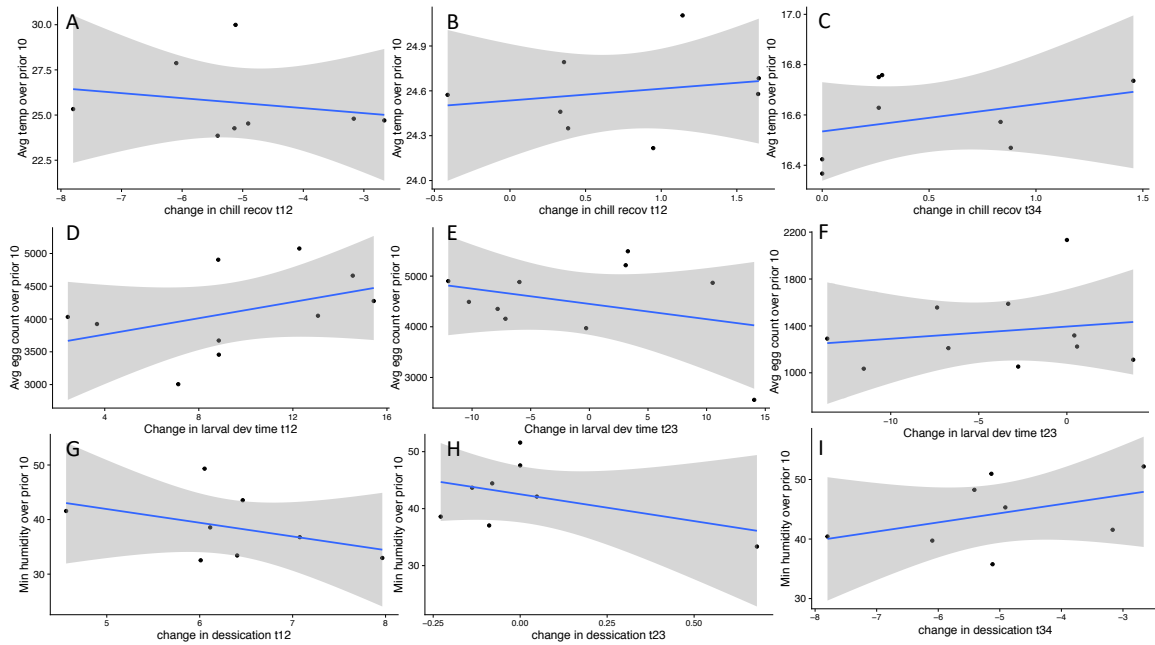

327  
 328 Figure S4: We assessed associations between cage to cage variation in environmental parameters  
 329 and the pace of phenotypic evolution. Panels A, B, and C show the relationship between the  
 330 average temperature in each cage (measured in 8 cages) over the 10 days preceding phenotyping  
 331 and the change in genetic chill coma recovery time. Panels D, E, and F show the correlation  
 332 between the average egg count and the change in genetic larval development rate. Panels G, H,  
 333 and I show the correlation between the minimum humidity (measured in 8 cages) over the 10  
 334 days preceding phenotyping and the change in genetic desiccation tolerance. Overall, these  
 335 associations did not uncover clear evidence of a specific environmental factor that drove cage to  
 336 cage variation in evolutionary trajectories, suggesting that the agent of selection was something  
 337 that did not vary strongly across cages, was not measured, or was shaped by several  
 338 environmental factors over each time interval.  
 339

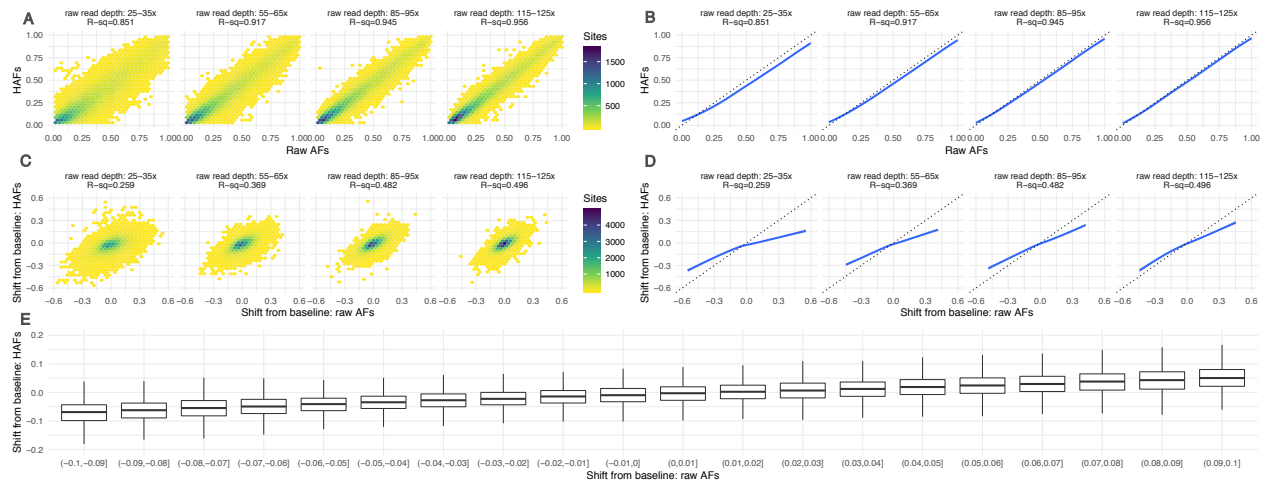

341  
 342 Fig. S5. Haplotype-derived allele frequencies (HAFs; y-axis) obtained via low-coverage (~5x)  
 343 sequencing of timepoint-5 samples followed by inference from founder haplotypes were  
 344 compared to raw allele frequencies (x-axis) from deep re-sequencing of the same samples. Sites  
 345 were binned by read depth in the deeply sequenced samples (separate panels). In all panels,  
 346 concordance between HAFs and raw AFs increases as read depth of raw AFs increase,  
 347 suggesting HAFs are effectively as accurate as raw AFs at >100x. A) Heatmaps of HAFs vs raw  
 348 AFs for the same sample and site. B) Line of best fit (blue) for correlation between HAFs and  
 349 raw AFs compared to line of perfect correlation (gray). C) Heatmaps of the shift between  
 350 baseline and timepoint-5 calculated via HAFs vs raw AFs for the same sample and site D) Line  
 351 of best fit (blue) for correlation between shifts from baseline calculated from HAFs vs raw AFs  
 352 compared to line of perfect correlation (gray). E) Boxplots of HAF shifts binned by raw AF shift,  
 353 at sites with raw read depth  $\geq 115x$ . All boxplots represent distributions with significantly  
 354 different means (t-test p-values < .05).  
 355

356

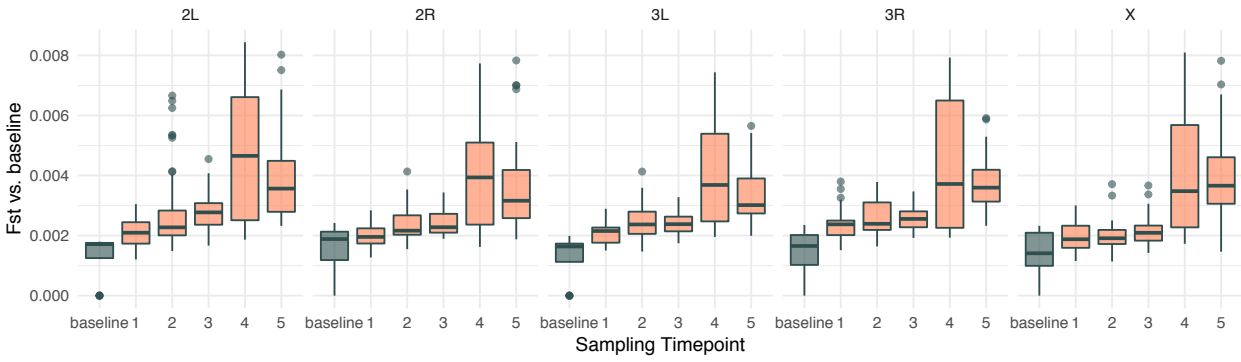

357  
358  
359  
360

Fig. S6. Distributions of chromosome-wide mean  $F_{st}$  between biological replicates from the baseline population (gray) or between experimental samples from each sampling timepoint and baseline samples (coral).

361

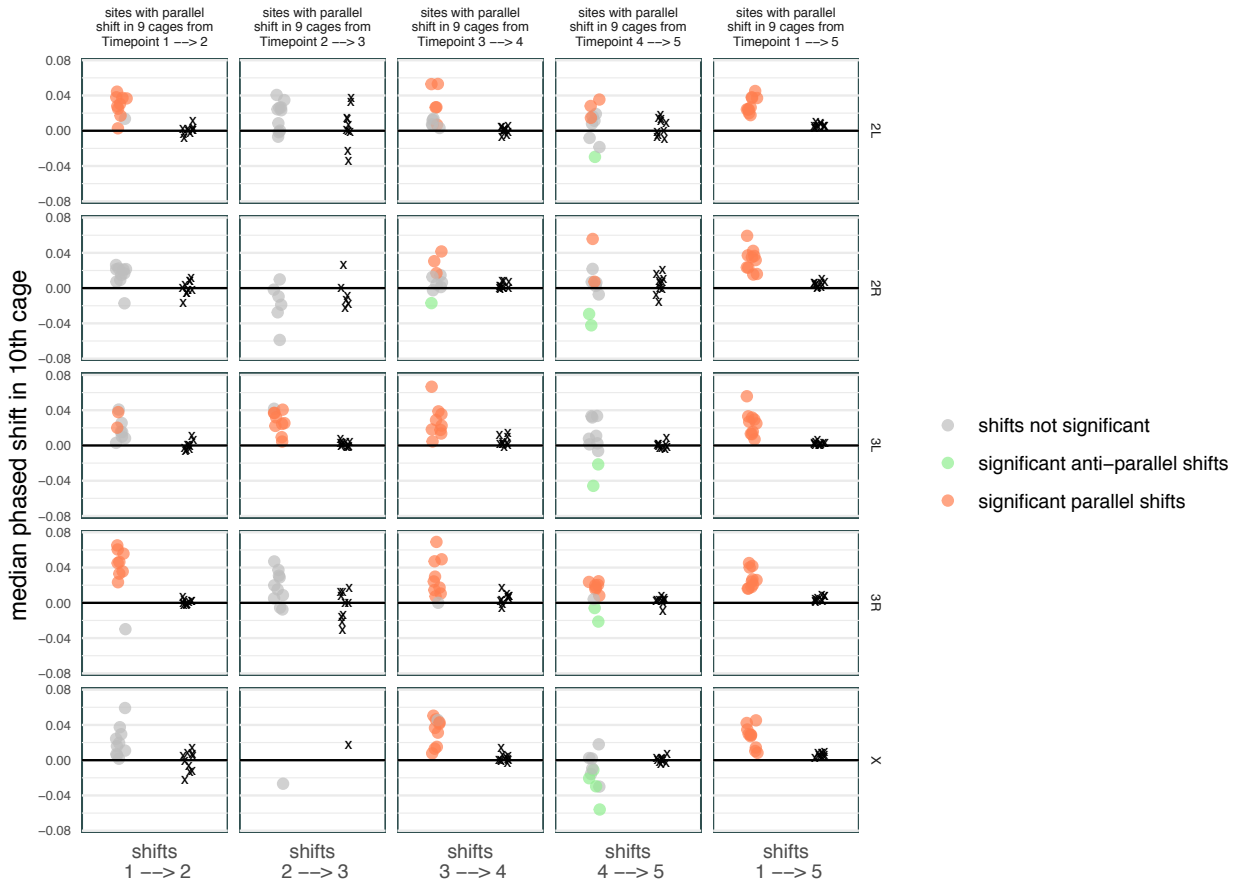

362  
 363  
 364  
 365  
 366  
 367  
 368  
 369  
 370  
 371

Figure S7. Per-chromosome leave-one out 10-fold cross-validation of significant sites. In each round, significantly parallel sites at each time-segment were identified using 9 of the 10 cages, then the shift at those sites in the 10th left-out cage was measured at the same time segment. In each case, the set of shifts at parallel sites was compared to shifts at control sites matched for chromosome and initial frequency to determine whether shifts in the left-out cage at parallel sites were also significantly parallel (orange) or significantly anti-parallel (green). Median shift for each set of parallel sites (circles) and control sites (x marks) on each chromosome (rows) at each time segment (columns) are plotted for each left-out cage.

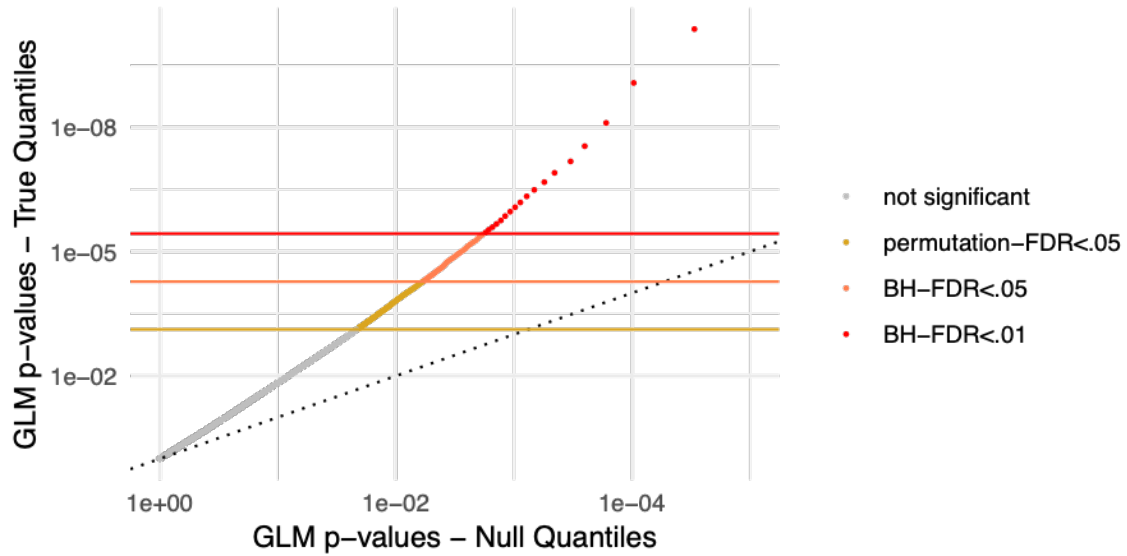

372  
 373  
 374  
 375  
 376  
 377

Fig S8. QQ plots for per-SNP GLM p-values giving the significance of a parallel shift across 10 replicate cages for true data (y-axis) and null model (x-axis) where timepoint labels for each site were shuffled across samples before fitting the GLM. Color of each point indicates whether the p-value for the true quantile passes various FDR thresholds.

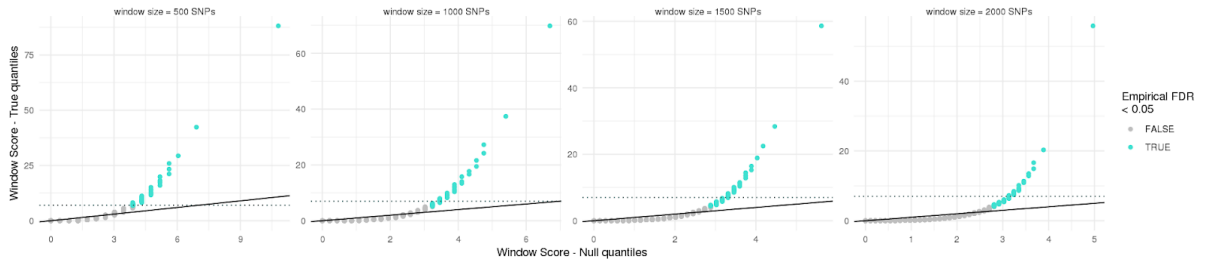

379  
380  
381  
382  
383  
384  
385

Figure S9. QQ plots of the distribution of significant sites in various equi-SNP sized sliding windows. Each SNP was scored (0, 1, 2, or 3) according to significance of parallelism at each time segment (see Methods). SNP-scores were averaged across consecutive SNPs to generate a window score. True window score quantiles (y-axis) were compared to quantiles from a null distribution generated by randomly shuffling SNP labels.

386  
387  
388

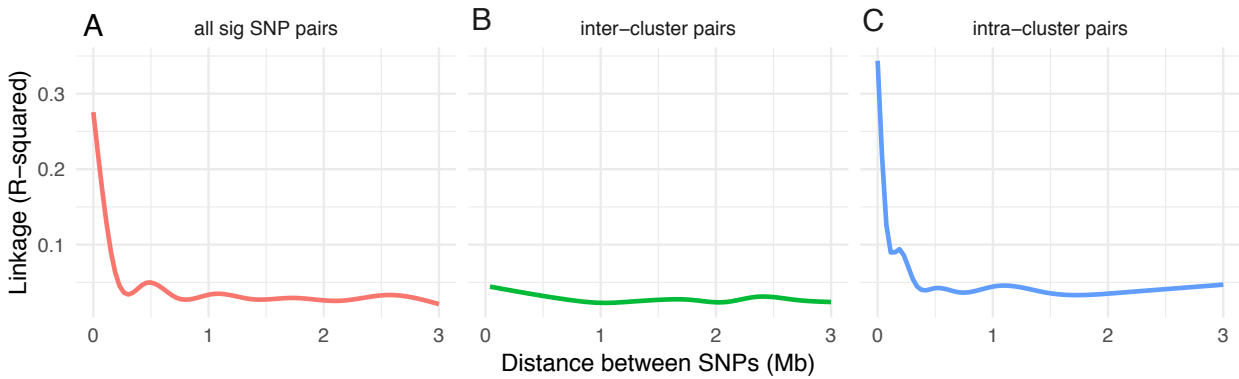

389  
390  
391  
392  
393  
394  
395  
396

Figure S10. Smoothed average of linkage values as a function of distance between SNPs, measured between **A**) all pairs of significant ( $FDR < .05$ ) SNPs on the same chromosome identified at the same time segment, **B**) pairs of SNPs on the same chromosome identified at the same time segment that were assigned to different clusters, and **C**) pairs of SNPs on the same chromosome identified at the same time segment that were assigned to the same cluster.



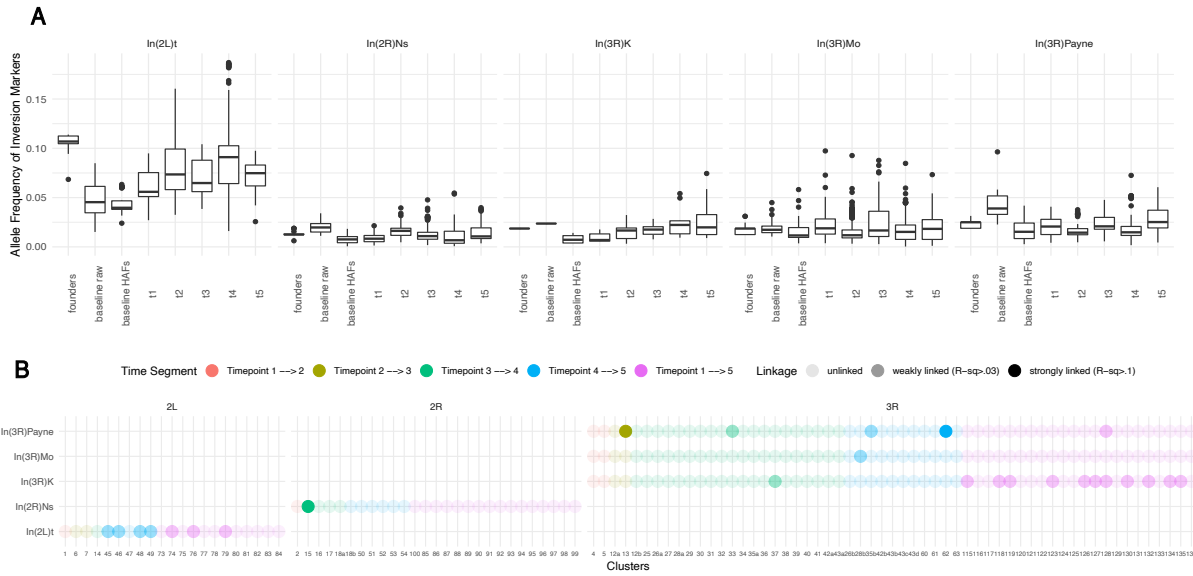

398  
 399 **Figure S11. A)** Distribution of the allele frequencies of inversion markers in the founder lines,  
 400 baseline population, and across cages at each timepoint. **B)** Linkage between clusters (x-axis) and  
 401 inversions (y-axis). Dots are colored by time segment of cluster identification and shading  
 402 indicates whether clusters are unlinked, weakly linked (average R-squared between significant  
 403 parallel SNPs and inversion markers is > 0.03) or strongly linked (average R-squared > 0.1).

404

405

406

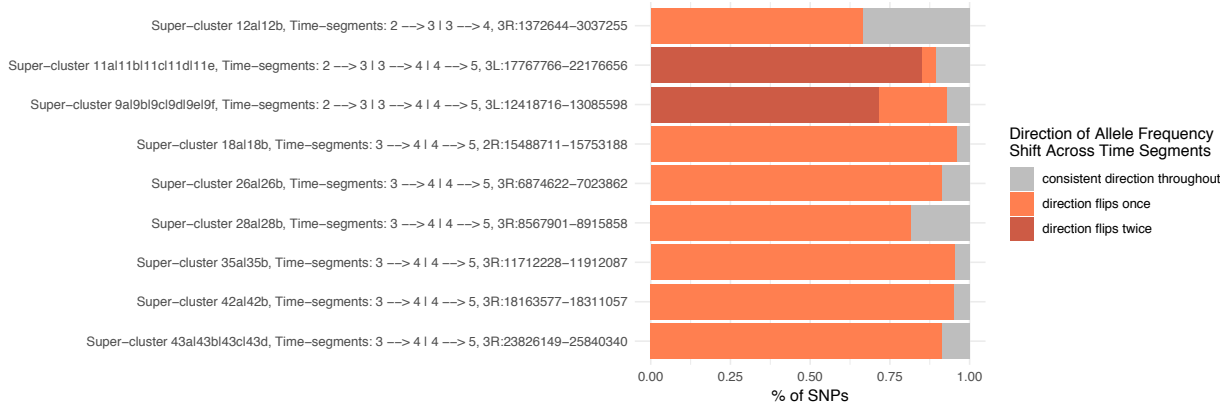

407  
 408  
 409  
 410  
 411  
 412  
 413  
 414  
 415

Figure S12. Proportion of SNPs in the intersection of linked clusters from different time segments (aka superclusters) that continue shifting in the same direction across months (gray) or flip direction (orange). Two superclusters involve linked clusters from three different time segments ( $T_2 \rightarrow T_3$ ,  $T_3 \rightarrow T_4$ , and  $T_4 \rightarrow T_5$ ); for these superclusters, color indicates the consistency of direction between  $T_2 \rightarrow T_3$  and  $T_3 \rightarrow T_4$ , followed by the consistency of direction between  $T_3 \rightarrow T_4$  and  $T_4 \rightarrow T_5$  (i.e., flips, same).

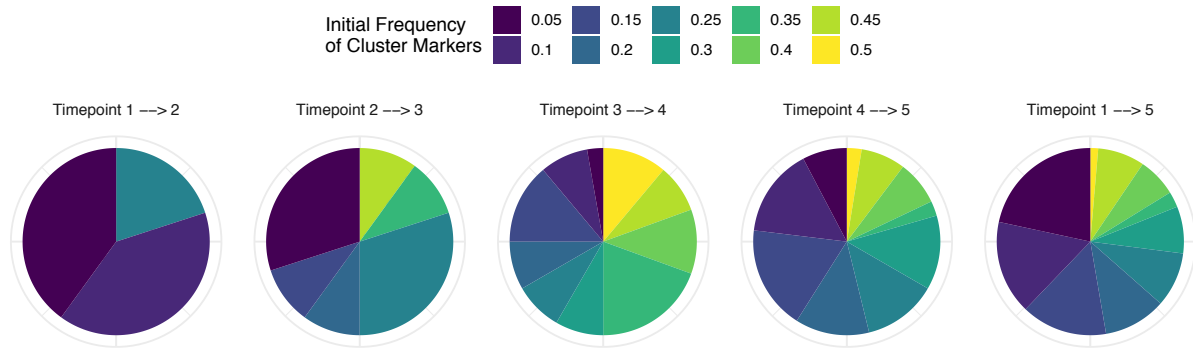

417  
418  
419  
420  
421  
422  
423  
424  
425  
426  
427  
428  
429

Figure S13. Distribution of the initial minor allele frequencies of marker SNPs for clusters identified at each time segment.

430

431 **References**

- 432 1. E. L. Behrman, S. S. Watson, K. R. O'Brien, M. S. Heschel, P. S. Schmidt, Seasonal  
433 variation in life history traits in two *Drosophila* species. *J. Evol. Biol.* 28, 1691–1704 (2015).
- 434 2. S. Tilk, A. Bergland, A. Goodman, P. Schmidt, D. Petrov, S. Greenblum, Accurate Allele  
435 Frequencies from Ultra-low Coverage Pool-Seq Samples in Evolve-and-Resequencing  
436 Experiments. *G3*. 9, 4159–4168 (2019).
- 437 3. C. A. Schneider, W. S. Rasband, K. W. Eliceiri, NIH Image to ImageJ: 25 years of image  
438 analysis. *Nat. Methods*. 9, 671–675 (2012).
- 439 4. S. Rajpurohit, E. Gefen, A. O. Bergland, D. A. Petrov, A. G. Gibbs, P. S. Schmidt,  
440 Spatiotemporal dynamics and genome-wide association genome-wide association analysis of  
441 desiccation tolerance in *Drosophila melanogaster*. *Mol. Ecol.* 27, 3525–3540 (2018).
- 442 5. J. B. S. Haldane, Suggestions as to quantitative measurement of rates of evolution.  
443 *Evolution*. 3, 51–56 (1949).
- 444 6. P. D. Gingerich, Quantification and comparison of evolutionary rates. *Am. J. Sci.* 293,  
445 453–478 (1993).
- 446 7. A. P. Hendry, T. J. Farrugia, M. T. Kinnison, Human influences on rates of phenotypic  
447 change in wild animal populations. *Mol. Ecol.* 17, 20–29 (2008).
- 448 8. H. Jiang, R. Lei, S.-W. Ding, S. Zhu, Skewer: a fast and accurate adapter trimmer for next-  
449 generation sequencing paired-end reads. *BMC Bioinformatics*. 15, 182 (2014).
- 450 9. J. Zhang, K. Kobert, T. Flouri, A. Stamatakis, PEAR: a fast and accurate Illumina Paired-  
451 End reAd mergeR. *Bioinformatics*. 30, 614–620 (2014).
- 452 10. H. Li, R. Durbin, Fast and accurate short read alignment with Burrows-Wheeler  
453 transform. *Bioinformatics*. 25, 1754–1760 (2009).
- 454 11. G. A. Van der Auwera, M. O. Carneiro, C. Hartl, R. Poplin, G. Del Angel, A. Levy-  
455 Moonshine, T. Jordan, K. Shakir, D. Roazen, J. Thibault, E. Banks, K. V. Garimella, D.  
456 Altshuler, S. Gabriel, M. A. DePristo, From FastQ data to high confidence variant calls: the  
457 Genome Analysis Toolkit best practices pipeline. *Curr. Protoc. Bioinformatics*. 43, 11.10.1–  
458 33 (2013).
- 459 12. H. Li, B. Handsaker, A. Wysoker, T. Fennell, J. Ruan, N. Homer, G. Marth, G. Abecasis,  
460 R. Durbin, 1000 Genome Project Data Processing Subgroup, The Sequence Alignment/Map  
461 format and SAMtools. *Bioinformatics*. 25, 2078–2079 (2009).
- 462 13. M. Baym, S. Kryazhimskiy, T. D. Lieberman, H. Chung, M. M. Desai, R. Kishony,  
463 Inexpensive Multiplexed Library Preparation for Megabase-Sized Genomes. *PLoS One*. 10,  
464 e0128036 (2015).
- 465 14. R. Kofler, P. Orozco-terWengel, N. De Maio, R. V. Pandey, V. Nolte, A. Futschik, C.  
466 Kosiol, C. Schlötterer, PoPoolation: a toolbox for population genetic analysis of next  
467 generation sequencing data from pooled individuals. *PLoS One*. 6, e15925 (2011).
- 468 15. D. Kessner, J. Novembre, forqs: forward-in-time simulation of recombination,  
469 quantitative traits and selection. *Bioinformatics*. 30, 576–577 (2013).
- 470 16. J. M. Comeron, R. Ratnappan, S. Bailin, The many landscapes of recombination in

471 *Drosophila melanogaster*. PLoS Genet. 8, e1002905 (2012).  
472 17. M. Kapun, T. Flatt, The adaptive significance of chromosomal inversion polymorphisms  
473 in *Drosophila melanogaster*. Mol. Ecol. 28, 1263–1282 (2019).  
474 18. M.-P. Weng, B.-Y. Liao, modPhEA: model organism Phenotype Enrichment Analysis of  
475 eukaryotic gene sets. Bioinformatics. 33, 3505–3507 (2017).  
476  
477  
478  
479  
480  
481  
482
